# Supplementary material for: Tracing RNA viruses associated with Nudibranchia gastropods
Source: PeerJ. 2022 May 13;10:e13410. doi: 10.7717/peerj.13410 (PMC9109684; doi:10.7717/peerj.13410)
Supplement: Supplemental Information 1 — Sequence ID, confidence value for RNA viruses, number of identified hallmark, contig length in base pair, provirus, number of identified genes, number of viral genes, number of host genes, CheckV quality value, contamination level and warnings are reported. [file peerj-10-13410-s001.xlsx]

## Sheet: S.Table1
seqname	RNA	hallmark	contig_length	provirus	gene_count	viral_genes	host_genes	checkv_quality	contamination	warnings
SRR1719366_492||full	0.735	0	12140	No	2	0	0	Not-determined	0.0	no viral genes detected
SRR1719366_802||full	0.685	0	2452	No	2	0	1	Not-determined	0.0	no viral genes detected
SRR1719366_1769||full	0.545	0	3489	No	2	0	0	Not-determined	0.0	no viral genes detected
SRR1719366_1782||full	0.790	0	3193	No	2	0	1	Not-determined	0.0	no viral genes detected
SRR1719366_1885||full	0.515	0	7334	No	5	1	0	Low-quality	0.0
SRR1719366_2465||full	0.525	0	3290	No	2	0	2	Low-quality	0.0	no viral genes detected
SRR1719366_3650||full	0.655	0	4820	No	3	1	0	Low-quality	0.0
SRR1719366_4553||full	0.755	0	2765	No	2	1	0	Low-quality	0.0
SRR1719366_4669||full	0.515	0	3201	No	2	0	1	Not-determined	0.0	no viral genes detected
SRR1719366_4907||full	0.765	0	7956	No	2	1	0	Low-quality	0.0
SRR1719366_5056||full	0.870	0	4642	No	2	1	0	Low-quality	0.0
SRR1719366_5215||full	0.925	0	1548	No	3	1	0	Low-quality	0.0
SRR1719366_6664||full	0.590	0	2652	No	2	0	1	Not-determined	0.0	no viral genes detected
SRR1719366_8565||full	0.600	0	4072	No	4	0	1	Not-determined	0.0	no viral genes detected
SRR1719366_10276||full	0.770	0	6147	No	2	1	0	Low-quality	0.0
SRR1719366_10359||full	0.630	0	4344	No	4	0	1	Low-quality	0.0	no viral genes detected
SRR1719366_11191||full	0.525	0	2720	No	3	0	1	Not-determined	0.0	no viral genes detected
SRR1719366_12230||full	0.675	0	2720	No	2	0	0	Not-determined	0.0	no viral genes detected
SRR1719366_15415||full	0.590	0	4650	No	3	1	0	Low-quality	0.0
SRR1719366_16115||full	0.530	0	3995	No	3	0	0	Low-quality	0.0	no viral genes detected
SRR1719366_16664||full	0.530	0	1709	No	2	0	1	Not-determined	0.0	no viral genes detected
SRR1719366_17043||full	0.585	0	5973	No	7	0	1	Not-determined	0.0	no viral genes detected
SRR1719366_17155||full	0.660	0	1808	No	2	0	0	Not-determined	0.0	no viral genes detected
SRR1719366_18212||full	0.870	0	3852	No	2	0	1	Not-determined	0.0	no viral genes detected
SRR1719366_21538||full	0.690	0	2081	No	2	0	1	Not-determined	0.0	no viral genes detected
SRR1719366_25954||full	0.735	0	5399	No	2	0	1	Not-determined	0.0	no viral genes detected
SRR1721590_536||full	0.670	0	4947	No	2	0	1	Not-determined	0.0	no viral genes detected
SRR1721590_1075||full	0.605	0	1828	No	2	1	0	Low-quality	0.0
SRR1721590_1544||full	0.745	0	4001	No	2	1	0	Low-quality	0.0
SRR1721590_2326||full	0.740	0	2190	No	2	0	1	Low-quality	0.0	no viral genes detected
SRR1721590_2379||full	0.525	0	5950	No	2	0	1	Low-quality	0.0	no viral genes detected
SRR1721590_2380||full	0.500	0	4008	No	2	0	1	Low-quality	0.0	no viral genes detected
SRR1721590_3298||full	0.680	0	6019	No	2	0	1	Not-determined	0.0	no viral genes detected
SRR1721590_4107||full	0.720	0	2231	No	3	0	1	Not-determined	0.0	no viral genes detected
SRR1721590_5005||full	0.610	0	3328	No	2	0	0	Low-quality	0.0	no viral genes detected
SRR1721590_6771||full	0.685	0	2619	No	3	0	0	Not-determined	0.0	no viral genes detected
SRR1721590_7856||full	0.545	0	1966	No	2	1	0	Low-quality	0.0
SRR1721590_8351||full	0.500	0	8318	No	2	0	1	Not-determined	0.0	no viral genes detected
SRR1721590_9350||full	0.600	0	2027	No	2	0	0	Not-determined	0.0	no viral genes detected
SRR1721590_9693||full	0.585	0	3899	No	4	0	0	Not-determined	0.0	no viral genes detected
SRR1721590_10103||full	0.540	0	2886	No	2	0	0	Not-determined	0.0	no viral genes detected
SRR1721590_10554||full	0.515	0	6834	No	7	0	1	Not-determined	0.0	no viral genes detected
SRR1721590_11269||full	0.685	0	3908	No	3	0	1	Not-determined	0.0	no viral genes detected
SRR1721590_11900||full	0.815	0	4804	No	2	0	0	Not-determined	0.0	no viral genes detected
SRR1721590_12289||full	0.645	0	1802	No	2	0	0	Not-determined	0.0	no viral genes detected
SRR1721590_13326||full	0.520	0	3890	No	3	0	1	Not-determined	0.0	no viral genes detected
SRR1721590_13460||full	0.935	0	1812	No	2	0	1	Not-determined	0.0	no viral genes detected
SRR1721590_15975||full	0.520	0	5548	No	2	0	2	Not-determined	0.0	no viral genes detected
SRR1721590_16841||full	0.625	0	6059	No	2	0	0	Not-determined	0.0	no viral genes detected
SRR1721590_17789||full	0.585	0	1569	No	2	0	0	Not-determined	0.0	no viral genes detected
SRR1721590_19957||full	0.875	0	2781	No	2	0	0	Low-quality	0.0	no viral genes detected
SRR1721590_20893||full	0.835	0	2019	No	2	1	0	Low-quality	0.0
SRR1721590_26730||full	0.930	0	2539	No	2	0	1	Not-determined	0.0	no viral genes detected
SRR1721590_51669||full	0.655	0	1947	No	2	0	1	Low-quality	0.0	no viral genes detected
SRR1721590_53027||full	0.580	0	3728	No	2	0	1	Low-quality	0.0	no viral genes detected
SRR1950939_1770||full	0.605	0	4151	No	4	0	1	Low-quality	0.0	no viral genes detected
SRR1950939_2801||full	0.700	0	2626	No	2	0	1	Low-quality	0.0	no viral genes detected
SRR1950939_3019||full	0.675	0	3374	No	2	1	0	Low-quality	0.0
SRR1950939_6316||full	0.550	0	2052	No	2	0	1	Not-determined	0.0	no viral genes detected
SRR1950939_9537||full	0.615	0	1913	No	3	1	0	Low-quality	0.0
SRR1950939_10168||full	0.715	0	1516	No	2	1	0	Low-quality	0.0
SRR1950939_19641||full	0.615	0	5497	No	2	0	1	Not-determined	0.0	no viral genes detected
SRR1950939_36396||full	0.675	0	1997	No	2	0	0	Not-determined	0.0	no viral genes detected
SRR1950939_39788||full	0.775	0	1727	No	2	0	0	Not-determined	0.0	no viral genes detected
SRR1950940_23||full	0.690	0	7620	No	3	1	0	Low-quality	0.0
SRR1950940_213||full	0.605	0	2072	No	2	0	1	Not-determined	0.0	no viral genes detected
SRR1950940_242||full	0.745	0	5944	No	3	0	0	Not-determined	0.0	no viral genes detected
SRR1950940_253||full	0.725	0	2860	No	2	0	1	Low-quality	0.0	no viral genes detected
SRR1950940_342||full	0.975	0	2324	No	2	0	1	Low-quality	0.0	no viral genes detected
SRR1950940_818||full	1000	1	8834	No	2	2	0	Medium-quality	0.0
SRR1950940_3176||full	0.620	0	3007	No	2	0	0	Not-determined	0.0	no viral genes detected
SRR1950940_4145||full	0.585	0	2578	No	3	0	1	Low-quality	0.0	no viral genes detected
SRR1950940_5990||full	0.580	0	4076	No	2	1	0	Low-quality	0.0
SRR1950940_8833||full	0.715	0	3459	No	2	0	1	Not-determined	0.0	no viral genes detected
SRR1950940_9033||full	0.780	0	6721	No	3	0	1	Low-quality	0.0	no viral genes detected
SRR1950940_11883||full	0.780	0	3332	No	1	1	0	Low-quality	0.0
SRR1950940_14857||full	0.570	0	2020	No	2	0	1	Low-quality	0.0	no viral genes detected
SRR1950940_16173||full	0.990	0	1804	No	2	0	1	Not-determined	0.0	no viral genes detected
SRR1950940_22366||full	0.530	0	1625	No	2	0	1	Not-determined	0.0	no viral genes detected
SRR1950941_672||full	0.830	0	3146	No	2	0	1	Not-determined	0.0	no viral genes detected
SRR1950941_1804||full	0.630	0	2486	No	2	0	1	Not-determined	0.0	no viral genes detected
SRR1950941_1894||full	0.715	0	6781	No	2	1	0	Low-quality	0.0
SRR1950941_2393||full	0.695	0	1815	No	2	0	1	Not-determined	0.0	no viral genes detected
SRR1950941_5219||full	0.695	0	2730	No	2	0	1	Not-determined	0.0	no viral genes detected
SRR1950941_6934||full	0.765	0	3442	No	5	0	0	Not-determined	0.0	no viral genes detected
SRR1950941_7237||full	0.530	0	4479	No	2	0	0	Not-determined	0.0	no viral genes detected
SRR1950941_8410||full	0.740	0	2628	No	3	0	0	Not-determined	0.0	no viral genes detected
SRR1950941_16285||full	0.850	0	2540	No	2	0	0	Not-determined	0.0	no viral genes detected
SRR1950942_545||full	0.615	0	1992	No	2	0	1	Not-determined	0.0	no viral genes detected
SRR1950942_1839||full	0.565	0	2921	No	2	0	1	Not-determined	0.0	no viral genes detected
SRR1950942_1999||full	0.820	0	1884	No	2	0	1	Not-determined	0.0	no viral genes detected
SRR1950942_4074||full	0.990	1	2259	No	2	0	1	Low-quality	0.0	no viral genes detected
SRR1950943_185||full	0.795	0	8133	No	4	0	0	Not-determined	0.0	no viral genes detected
SRR1950943_869||full	0.945	0	2187	No	2	0	1	Low-quality	0.0	no viral genes detected
SRR1950943_1020||full	0.515	0	2275	No	2	0	0	Not-determined	0.0	no viral genes detected
SRR1950943_1568||full	0.685	0	1959	No	2	0	1	Low-quality	0.0	no viral genes detected
SRR1950943_1636||full	0.705	0	2503	No	2	0	1	Not-determined	0.0	no viral genes detected
SRR1950943_2442||full	0.520	0	7275	No	3	1	0	Low-quality	0.0
SRR1950943_2882||full	0.655	0	5071	No	2	0	0	Not-determined	0.0	no viral genes detected
SRR1950943_5526||full	0.655	0	3480	No	3	0	0	Not-determined	0.0	no viral genes detected
SRR1950943_6702||full	0.760	0	3068	No	5	1	0	Low-quality	0.0
SRR1950943_6865||full	0.585	0	1569	No	2	0	1	Not-determined	0.0	no viral genes detected
SRR1950943_8802||full	0.510	0	3367	No	3	0	1	Not-determined	0.0	no viral genes detected
SRR1950943_13420||full	0.740	0	5712	No	4	0	1	Not-determined	0.0	no viral genes detected
SRR1950943_14324||full	0.810	0	2231	No	3	0	1	Not-determined	0.0	no viral genes detected
SRR1950943_16169||full	0.600	0	3670	No	2	1	0	Low-quality	0.0
SRR1950943_19571||full	0.970	0	2431	No	2	0	0	Not-determined	0.0	no viral genes detected
SRR1950943_20852||full	0.650	0	1540	No	2	0	0	Not-determined	0.0	no viral genes detected
SRR1950944_1010||full	0.935	0	1655	No	2	0	0	Not-determined	0.0	no viral genes detected
SRR1950944_5905||full	0.835	0	2402	No	2	0	1	Not-determined	0.0	no viral genes detected
SRR1950944_7296||full	0.500	0	1986	No	2	0	1	Not-determined	0.0	no viral genes detected
SRR1950944_8813||full	0.710	0	1642	No	2	0	1	Low-quality	0.0	no viral genes detected
SRR1950944_20588||full	0.800	0	3417	No	3	1	0	Low-quality	0.0
SRR1950944_21605||full	0.595	0	2166	No	2	0	0	Low-quality	0.0	no viral genes detected
SRR1950944_27354||full	0.745	0	1791	No	2	0	0	Not-determined	0.0	no viral genes detected
SRR1950944_34883||full	0.795	0	1724	No	4	0	0	Not-determined	0.0	no viral genes detected
SRR1950945_256||full	0.575	0	1639	No	2	0	1	Not-determined	0.0	no viral genes detected
SRR1950945_633||full	0.570	0	3484	No	2	0	1	Not-determined	0.0	no viral genes detected
SRR1950945_1591||full	0.675	0	1840	No	2	0	0	Not-determined	0.0	no viral genes detected
SRR1950945_3844||full	0.635	0	5956	No	2	0	1	Low-quality	0.0	no viral genes detected
SRR1950945_12475||full	0.710	0	4682	No	5	0	0	Not-determined	0.0	no viral genes detected
SRR1950945_21676||full	0.865	0	3276	No	3	0	0	Not-determined	0.0	no viral genes detected
SRR1950945_34730||full	0.790	0	2016	No	3	0	1	Not-determined	0.0	no viral genes detected
SRR1950946_1268||full	0.640	0	1884	No	2	0	1	Not-determined	0.0	no viral genes detected
SRR1950946_1710||full	0.945	0	2137	No	2	0	0	Not-determined	0.0	no viral genes detected
SRR1950946_4269||full	0.790	0	1887	No	2	0	1	Not-determined	0.0	no viral genes detected
SRR1950946_4947||full	0.695	0	1544	No	2	0	1	Not-determined	0.0	no viral genes detected
SRR1950946_6763||full	0.645	0	2219	No	2	0	1	Not-determined	0.0	no viral genes detected
SRR1950946_11791||full	0.720	0	4359	No	2	1	0	Low-quality	0.0
SRR1950946_14593||full	0.565	0	1921	No	3	0	1	Not-determined	0.0	no viral genes detected
SRR1950946_14652||full	0.845	0	1783	No	2	1	0	Low-quality	0.0
SRR1950946_16700||full	0.535	0	1906	No	2	0	1	Not-determined	0.0	no viral genes detected
SRR1950946_17341||full	0.830	0	2633	No	2	0	0	Not-determined	0.0	no viral genes detected
SRR1950947_95||full	0.625	0	2386	No	2	0	1	Not-determined	0.0	no viral genes detected
SRR1950947_3094||full	0.820	0	1702	No	2	0	1	Not-determined	0.0	no viral genes detected
SRR1950947_3902||full	0.675	0	1635	No	2	1	0	Low-quality	0.0
SRR1950947_14781||full	0.840	0	2539	No	2	0	0	Not-determined	0.0	no viral genes detected
SRR1950947_16648||full	0.570	0	1517	No	2	0	1	Not-determined	0.0	no viral genes detected
SRR1950947_17985||full	0.735	0	3343	No	2	0	1	Not-determined	0.0	no viral genes detected
SRR1950948_525||full	0.590	0	1614	No	2	1	0	Low-quality	0.0
SRR1950948_1303||full	0.730	0	3166	No	3	0	1	Not-determined	0.0	no viral genes detected
SRR1950948_1797||full	0.755	0	6024	No	3	0	1	Low-quality	0.0	no viral genes detected
SRR1950948_4609||full	0.550	0	8714	No	1	0	0	Not-determined	0.0	no viral genes detected
SRR1950948_7064||full	0.630	0	1542	No	2	0	1	Not-determined	0.0	no viral genes detected
SRR1950948_14959||full	0.635	0	2233	No	2	0	1	Not-determined	0.0	no viral genes detected
SRR1950948_15935||full	0.710	0	4692	No	2	0	1	Low-quality	0.0	no viral genes detected
SRR1950949_1772||full	0.515	0	1527	No	3	0	0	Low-quality	0.0	no viral genes detected
SRR1950949_2406||full	1000	1	2378	No	3	0	1	Not-determined	0.0	no viral genes detected
SRR1950949_2867||full	0.765	0	3196	No	1	1	0	Not-determined	0.0
SRR1950949_4026||full	0.575	0	1519	No	1	1	0	Not-determined	0.0
SRR1950949_6757||full	0.920	0	2382	No	2	0	1	Low-quality	0.0	no viral genes detected
SRR1950949_18608||full	0.780	0	9654	No	3	1	0	High-quality	0.0
SRR1950950_286||full	0.845	0	2878	No	3	0	0	Low-quality	0.0	no viral genes detected
SRR1950950_820||full	0.695	0	4653	No	2	0	1	Low-quality	0.0	no viral genes detected
SRR1950950_870||full	0.950	0	4132	No	2	0	1	Low-quality	0.0	no viral genes detected
SRR1950950_1279||full	0.540	0	1906	No	2	1	0	Low-quality	0.0
SRR1950950_1355||full	0.945	0	2813	No	2	1	0	Low-quality	0.0
SRR1950950_1817||full	0.545	0	3687	No	3	0	0	Not-determined	0.0	no viral genes detected
SRR1950950_2083||full	0.870	0	2795	No	2	0	1	Not-determined	0.0	no viral genes detected
SRR1950950_4565||full	0.500	0	4503	No	5	1	0	Low-quality	0.0
SRR1950950_5153||full	0.865	0	2118	No	2	0	0	Not-determined	0.0	no viral genes detected
SRR1950950_6280||full	0.945	0	3986	No	3	0	1	Not-determined	0.0	no viral genes detected
SRR1950950_6904||full	0.595	0	1720	No	2	1	0	Low-quality	0.0
SRR1950950_7049||full	0.820	0	2853	No	2	0	1	Not-determined	0.0	no viral genes detected
SRR1950950_7312||full	0.620	0	1604	No	2	0	1	Low-quality	0.0	no viral genes detected
SRR1950950_7796||full	0.665	0	2210	No	2	0	0	Not-determined	0.0	no viral genes detected
SRR1950950_8523||full	0.785	0	2786	No	3	0	1	Not-determined	0.0	no viral genes detected
SRR1950950_9852||full	0.605	0	3718	No	2	0	0	Not-determined	0.0	no viral genes detected
SRR1950950_25270||full	0.685	0	2500	No	2	0	1	Not-determined	0.0	no viral genes detected
SRR1950950_28348||full	0.870	0	3496	No	3	0	0	Low-quality	0.0	no viral genes detected
SRR1950950_31676||full	0.685	0	1737	No	2	0	0	Not-determined	0.0	no viral genes detected
SRR1950951_84||full	0.815	0	1662	No	2	0	0	Not-determined	0.0	no viral genes detected
SRR1950951_651||full	0.530	0	1901	No	3	1	0	Low-quality	0.0
SRR1950951_1558||full	0.545	0	1581	No	2	0	1	Not-determined	0.0	no viral genes detected
SRR1950951_2042||full	0.535	0	2531	No	2	0	0	Not-determined	0.0	no viral genes detected
SRR1950951_2579||full	0.535	0	2194	No	2	0	1	Not-determined	0.0	no viral genes detected
SRR1950951_6083||full	0.690	0	2554	No	4	0	1	Low-quality	0.0	no viral genes detected
SRR1950951_6179||full	0.715	0	6141	No	1	1	0	Low-quality	0.0
SRR1950951_6598||full	0.520	0	4056	No	2	0	0	Not-determined	0.0	no viral genes detected
SRR1950951_9200||full	0.710	0	4298	No	3	1	0	Low-quality	0.0
SRR1950951_12259||full	0.590	0	4295	No	2	0	0	Not-determined	0.0	no viral genes detected
SRR1950951_41250||full	0.530	0	6244	No	1	1	0	Medium-quality	0.0
SRR1950951_52775||full	0.785	0	2627	No	2	0	1	Low-quality	0.0	no viral genes detected
SRR1950952_1578||full	0.570	0	2180	No	3	0	1	Not-determined	0.0	no viral genes detected
SRR1950952_2697||full	0.825	0	2906	No	2	1	0	Low-quality	0.0
SRR1950952_2948||full	0.595	0	3279	No	2	1	0	Low-quality	0.0
SRR1950952_4184||full	0.565	0	1631	No	2	0	1	Not-determined	0.0	no viral genes detected
SRR1950952_4609||full	0.715	0	1856	No	1	1	0	Low-quality	0.0
SRR1950952_4999||full	0.610	0	1727	No	2	0	0	Low-quality	0.0	no viral genes detected
SRR1950952_5505||full	0.675	0	1899	No	2	0	0	Not-determined	0.0	no viral genes detected
SRR1950952_5620||full	0.760	0	1841	No	2	0	0	Not-determined	0.0	no viral genes detected
SRR1950952_11199||full	0.765	0	4250	No	4	1	0	Low-quality	0.0
SRR1950952_12735||full	0.790	0	2005	No	2	0	0	Not-determined	0.0	no viral genes detected
SRR1950952_16633||full	0.920	0	3661	No	5	0	0	Not-determined	0.0	no viral genes detected
SRR1950952_25721||full	0.750	0	3122	No	2	0	1	Not-determined	0.0	no viral genes detected
SRR1950952_28327||full	0.520	0	3570	No	5	0	0	Not-determined	0.0	no viral genes detected
SRR1950953_226||full	0.975	1	3260	No	5	1	0	Low-quality	0.0
SRR1950953_444||full	1000	1	4243	No	5	1	0	Low-quality	0.0
SRR1950953_547||full	0.535	0	1884	No	3	0	1	Not-determined	0.0	no viral genes detected
SRR1950953_2405||full	0.575	0	2813	No	2	0	1	Not-determined	0.0	no viral genes detected
SRR1950953_2449||full	0.950	0	2258	No	2	0	1	Not-determined	0.0	no viral genes detected
SRR1950953_4433||full	0.700	0	2348	No	2	0	0	Not-determined	0.0	no viral genes detected
SRR1950953_5951||full	0.555	0	2448	No	2	0	1	Not-determined	0.0	no viral genes detected
SRR1950953_7108||full	1000	1	13015	No	7	1	0	Low-quality	0.0
SRR1950953_7902||full	0.760	0	10163	No	2	2	0	High-quality	0.0
SRR1950953_10577||full	0.745	0	2618	No	2	0	1	Not-determined	0.0	no viral genes detected
SRR1950953_11028||full	0.920	0	11238	No	1	1	0	High-quality	0.0
SRR1950953_12233||full	0.725	0	2848	No	3	0	1	Not-determined	0.0	no viral genes detected
SRR1950953_14425||full	0.750	0	1877	No	2	0	1	Low-quality	0.0	no viral genes detected
SRR1950954_1794||full	0.695	0	2833	No	2	0	1	Not-determined	0.0	no viral genes detected
SRR1950954_4100||full	0.700	0	3529	No	2	0	0	Low-quality	0.0	no viral genes detected
SRR1950954_8268||full	0.750	0	9998	No	2	2	0	High-quality	0.0
SRR1950954_9267||full	0.740	0	2371	No	3	0	1	Not-determined	0.0	no viral genes detected
SRR1950954_11678||full	0.920	0	1653	No	3	1	0	Low-quality	0.0
SRR1950954_17734||full	0.505	0	1908	No	3	0	1	Not-determined	0.0	no viral genes detected
SRR3726692_538||full	0.500	0	1679	No	2	0	0	Not-determined	0.0	no viral genes detected
SRR3726692_1149||full	0.550	0	2361	No	1	0	0	Not-determined	0.0	no viral genes detected
SRR3726692_2784||full	0.530	0	3528	No	1	1	0	Low-quality	0.0
SRR3726692_4277||full	0.715	0	2760	No	3	0	1	Not-determined	0.0	no viral genes detected
SRR3726692_5347||full	0.540	0	2081	No	1	1	0	Low-quality	0.0
SRR3726692_5429||full	0.530	0	1951	No	1	1	0	Low-quality	0.0
SRR3726692_8964||full	0.600	0	1762	No	2	0	1	Not-determined	0.0	no viral genes detected
SRR3726692_9964||full	0.530	0	1764	No	3	0	0	Low-quality	0.0	no viral genes detected
SRR3726692_12384||full	0.595	0	1863	No	2	0	1	Low-quality	0.0	no viral genes detected
SRR3726693_23||full	1000	1	1990	No	2	0	1	Not-determined	0.0	no viral genes detected
SRR3726693_799||full	0.545	0	2982	No	4	1	0	Low-quality	0.0
SRR3726693_1017||full	0.655	0	2359	No	4	1	0	Low-quality	0.0
SRR3726693_1661||full	0.560	0	2587	No	2	1	0	Low-quality	0.0
SRR3726693_3148||full	0.605	0	3688	No	2	1	0	Low-quality	0.0
SRR3726693_4658||full	0.710	0	1718	No	2	0	1	Not-determined	0.0	no viral genes detected
SRR3726693_4860||full	0.805	0	4144	No	2	0	1	Not-determined	0.0	no viral genes detected
SRR3726693_5136||full	0.765	0	1765	No	2	1	0	Low-quality	0.0
SRR3726693_6969||full	0.730	0	2774	No	2	0	1	Not-determined	0.0	no viral genes detected
SRR3726693_8193||full	0.500	0	1590	No	2	0	1	Not-determined	0.0	no viral genes detected
SRR3726693_9331||full	0.525	0	2929	No	2	1	0	Low-quality	0.0
SRR3726693_10359||full	0.640	0	3147	No	2	0	1	Not-determined	0.0	no viral genes detected
SRR3726693_15109||full	0.625	0	6219	No	3	2	0	Medium-quality	0.0
SRR3726693_23005||full	0.605	0	3162	No	2	2	0	Low-quality	0.0
SRR3726693_24432||full	0.815	0	10990	No	1	1	0	Not-determined	0.0
SRR3726693_24926||full	0.600	0	1877	No	2	0	0	Not-determined	0.0	no viral genes detected
SRR3726693_39424||full	0.570	0	1896	No	2	0	1	Low-quality	0.0	no viral genes detected
SRR3726694_1057||full	0.650	0	3673	No	2	0	1	Low-quality	0.0	no viral genes detected
SRR3726694_1362||full	0.920	0	1960	No	1	1	0	Low-quality	0.0
SRR3726694_1665||full	0.600	0	1899	No	1	1	0	Low-quality	0.0
SRR3726694_1731||full	0.555	0	1785	No	2	0	1	Not-determined	0.0	no viral genes detected
SRR3726694_6683||full	0.505	0	9200	No	2	1	0	Medium-quality	0.0
SRR3726694_11055||full	0.895	0	2588	No	2	0	1	Not-determined	0.0	no viral genes detected
SRR3726694_11804||full	0.560	0	2855	No	3	0	1	Not-determined	0.0	no viral genes detected
SRR3726694_24261||full	0.990	1	5967	No	2	1	0	Low-quality	0.0
SRR3726695_552||full	0.725	0	2895	No	3	3	0	Low-quality	0.0	low-confidence DTR
SRR3726695_742||full	0.535	0	6102	No	1	1	0	Medium-quality	0.0
SRR3726695_3221||full	0.750	0	2385	No	3	0	1	Low-quality	0.0	no viral genes detected
SRR3726696_1143||full	0.615	0	2491	No	2	0	1	Not-determined	0.0	no viral genes detected
SRR3726696_1737||full	0.890	0	1635	No	2	0	0	Not-determined	0.0	no viral genes detected
SRR3726696_2291||full	0.605	0	3124	No	4	0	1	Not-determined	0.0	no viral genes detected
SRR3726696_5211||full	0.755	0	3196	No	2	0	1	Low-quality	0.0	no viral genes detected
SRR3726696_6086||full	0.805	0	1802	No	3	0	1	Not-determined	0.0	no viral genes detected
SRR3726696_6307||full	0.555	0	1668	No	2	1	0	Low-quality	0.0
SRR3726696_7331||full	0.615	0	2175	No	2	0	1	Not-determined	0.0	no viral genes detected
SRR3726696_7436||full	1000	1	2250	No	3	0	0	Low-quality	0.0	no viral genes detected
SRR3726696_14927||full	0.840	0	1868	No	2	0	0	Low-quality	0.0	no viral genes detected
SRR3726696_16517||full	0.510	0	1710	No	2	0	1	Low-quality	0.0	no viral genes detected
SRR3726696_18217||full	0.590	0	2626	No	3	0	1	Not-determined	0.0	no viral genes detected
SRR3726696_25529||full	0.630	0	1761	No	2	0	1	Not-determined	0.0	no viral genes detected
SRR3726697_1030||full	0.505	0	3676	No	2	0	1	Low-quality	0.0	no viral genes detected
SRR3726697_1085||full	0.660	0	8443	No	2	0	0	Not-determined	0.0	no viral genes detected
SRR3726697_1171||full	0.585	0	7518	No	2	0	0	Not-determined	0.0	no viral genes detected
SRR3726697_1829||full	0.645	0	3010	No	4	3	0	Low-quality	0.0
SRR3726697_1830||full	0.520	0	2260	No	2	0	0	Low-quality	0.0	no viral genes detected
SRR3726697_3957||full	0.555	0	5661	No	4	0	1	Not-determined	0.0	no viral genes detected
SRR3726697_5013||full	0.660	0	2886	No	2	0	1	Not-determined	0.0	no viral genes detected
SRR3726697_9617||full	0.545	0	2271	No	1	0	0	Not-determined	0.0	no viral genes detected
SRR3726697_10320||full	0.755	0	5556	No	2	0	1	Not-determined	0.0	no viral genes detected
SRR3726697_16709||full	0.515	0	1643	No	2	0	1	Not-determined	0.0	no viral genes detected
SRR3726698_3397||full	0.855	0	2450	No	2	0	1	Not-determined	0.0	no viral genes detected
SRR3726698_8019||full	0.650	0	3867	No	2	0	1	Not-determined	0.0	no viral genes detected
SRR3726699_2567||full	0.915	1	3238	No	5	1	0	Low-quality	0.0
SRR3726699_3443||full	0.805	0	2548	No	3	0	1	Not-determined	0.0	no viral genes detected
SRR3726699_5310||full	0.690	0	2863	No	3	0	1	Not-determined	0.0	no viral genes detected
SRR3726699_6736||full	0.515	0	3942	No	2	1	0	Low-quality	0.0
SRR3726699_16734||full	0.555	0	1872	No	3	0	1	Not-determined	0.0	no viral genes detected
SRR3726700_2001||full	0.500	0	2062	No	2	0	0	Not-determined	0.0	no viral genes detected
SRR3726700_2523||full	0.860	0	2539	No	2	0	1	Not-determined	0.0	no viral genes detected
SRR3726700_6256||full	0.555	0	4656	No	2	1	0	Medium-quality	0.0
SRR3726700_9248||full	0.595	0	1815	No	2	0	0	Not-determined	0.0	no viral genes detected
SRR3726700_10349||full	0.820	0	2447	No	2	1	0	Low-quality	0.0
SRR3726700_11725||full	0.605	0	6177	No	3	1	0	Low-quality	0.0
SRR3726700_20041||full	0.760	0	3304	No	2	0	0	Not-determined	0.0	no viral genes detected
SRR3726700_23001||full	0.545	0	2151	No	2	0	1	Not-determined	0.0	no viral genes detected
SRR3726700_23794||full	0.590	0	3225	No	3	0	1	Low-quality	0.0	no viral genes detected
SRR3726700_24734||full	0.665	0	2270	No	2	0	0	Not-determined	0.0	no viral genes detected
SRR3726701_237||full	0.715	0	1605	No	4	0	1	Not-determined	0.0	no viral genes detected
SRR3726701_2855||full	0.510	0	1599	No	2	0	0	Low-quality	0.0	no viral genes detected
SRR3726701_4654||full	0.660	0	2274	No	2	0	1	Not-determined	0.0	no viral genes detected
SRR3726701_4771||full	0.695	0	1772	No	2	0	1	Not-determined	0.0	no viral genes detected
SRR3726701_10878||full	0.930	0	3286	No	2	0	1	Not-determined	0.0	no viral genes detected
SRR3726701_11907||full	0.765	0	1701	No	1	1	0	Not-determined	0.0
SRR3726701_25851||full	0.845	0	2055	No	3	1	0	Low-quality	0.0
SRR3726702_7235||full	0.880	0	3256	No	4	1	0	Low-quality	0.0
SRR3726702_21356||full	0.870	0	5045	No	2	0	1	Low-quality	0.0	no viral genes detected
SRR3726702_21693||full	0.525	0	7098	No	2	1	0	Low-quality	0.0
SRR3726702_23905||full	0.830	0	4904	No	2	0	0	Not-determined	0.0	no viral genes detected
SRR3726703_381||full	0.650	0	2724	No	2	1	0	Low-quality	0.0
SRR3726703_1687||full	0.900	0	4326	No	2	1	0	Low-quality	0.0
SRR3726703_2370||full	0.580	0	4645	No	2	1	0	Low-quality	0.0
SRR3726703_6520||full	0.710	0	1596	No	2	0	0	Low-quality	0.0	no viral genes detected
SRR3726703_8724||full	0.645	0	5534	No	3	1	0	Low-quality	0.0
SRR3726703_14268||full	0.590	0	1776	No	2	0	0	Not-determined	0.0	no viral genes detected
SRR3726703_17095||full	0.575	0	3183	No	2	1	0	Low-quality	0.0
SRR3726703_19998||full	0.780	0	2689	No	2	0	1	Not-determined	0.0	no viral genes detected
SRR3726703_22171||full	0.750	0	1780	No	3	0	1	Not-determined	0.0	no viral genes detected
SRR3726703_24780||full	0.845	0	2074	No	2	0	1	Not-determined	0.0	no viral genes detected
SRR3726703_31477||full	0.680	0	2321	No	2	0	0	Not-determined	0.0	no viral genes detected
SRR3726703_37823||full	0.865	0	1785	No	2	0	0	Not-determined	0.0	no viral genes detected
SRR3726703_41923||full	0.570	0	1646	No	2	0	1	Low-quality	0.0	no viral genes detected
SRR3726703_43570||full	0.735	0	7004	No	3	1	0	Low-quality	0.0
SRR3726703_56419||full	0.585	0	2107	No	2	0	1	Not-determined	0.0	no viral genes detected
SRR3726703_57016||full	0.705	0	1891	No	2	1	0	Low-quality	0.0
SRR3726703_59243||full	0.730	0	1950	No	2	0	1	Not-determined	0.0	no viral genes detected
SRR3726704_843||full	0.685	0	2778	No	2	0	1	Not-determined	0.0	no viral genes detected
SRR3726704_1016||full	0.615	0	2083	No	2	0	1	Not-determined	0.0	no viral genes detected
SRR3726704_1234||full	0.515	0	1583	No	2	1	0	Low-quality	0.0
SRR3726704_3104||full	0.900	0	1593	No	2	0	0	Not-determined	0.0	no viral genes detected
SRR3726704_4465||full	0.685	0	1904	No	2	0	0	Not-determined	0.0	no viral genes detected
SRR3726704_4719||full	0.880	0	1523	No	2	0	1	Not-determined	0.0	no viral genes detected
SRR3726704_10714||full	0.755	0	2348	No	3	0	1	Low-quality	0.0	no viral genes detected
SRR3726704_11174||full	0.530	0	1883	No	2	0	1	Low-quality	0.0	no viral genes detected
SRR3726704_12055||full	0.755	0	2397	No	2	0	0	Not-determined	0.0	no viral genes detected
SRR3726704_12477||full	0.555	0	3531	No	2	0	1	Low-quality	0.0	no viral genes detected
SRR3726704_16421||full	0.610	0	5236	No	2	0	1	Not-determined	0.0	no viral genes detected
SRR3726704_16832||full	0.625	0	1600	No	2	0	0	Not-determined	0.0	no viral genes detected
SRR3726704_26225||full	0.615	0	4811	No	2	0	0	Not-determined	0.0	no viral genes detected
SRR3726705_2145||full	0.635	0	3254	No	2	0	1	Not-determined	0.0	no viral genes detected
SRR3726705_2195||full	0.765	0	3040	No	2	0	1	Not-determined	0.0	no viral genes detected
SRR3726705_2743||full	0.615	0	1582	No	2	0	0	Not-determined	0.0	no viral genes detected
SRR3726705_3738||full	0.730	0	2243	No	2	0	0	Not-determined	0.0	no viral genes detected
SRR3726705_3773||full	0.505	0	2192	No	2	0	0	Not-determined	0.0	no viral genes detected
SRR3726705_4016||full	0.705	0	1998	No	2	2	0	Low-quality	0.0
SRR3726705_4060||full	0.690	0	2027	No	2	0	1	Not-determined	0.0	no viral genes detected
SRR3726705_4711||full	0.535	0	2419	No	2	0	0	Not-determined	0.0	no viral genes detected
SRR3726705_5501||full	0.695	0	2042	No	2	0	0	Not-determined	0.0	no viral genes detected
SRR3726705_6261||full	0.725	0	2592	No	2	0	1	Not-determined	0.0	no viral genes detected
SRR3726705_6875||full	0.590	0	5918	No	3	1	0	Low-quality	0.0
SRR3726705_13258||full	0.825	0	7170	No	8	0	0	Not-determined	0.0	no viral genes detected
SRR3726706_856||full	0.675	0	7898	No	10	1	0	Low-quality	0.0
SRR3726706_1182||full	0.600	0	7671	No	2	0	0	Not-determined	0.0	no viral genes detected
SRR3726706_1491||full	0.505	0	3414	No	3	0	0	Not-determined	0.0	no viral genes detected
SRR3726706_2511||full	0.715	0	2817	No	2	1	0	Low-quality	0.0
SRR3726706_4377||full	0.555	0	3709	No	2	0	1	Not-determined	0.0	no viral genes detected
SRR3726706_4662||full	0.960	0	1736	No	3	1	0	Low-quality	0.0
SRR3726706_5175||full	0.565	0	1578	No	3	0	0	Not-determined	0.0	no viral genes detected
SRR3726706_5300||full	0.555	0	2528	No	2	0	1	Not-determined	0.0	no viral genes detected
SRR3726706_5809||full	0.675	0	3388	No	2	0	1	Not-determined	0.0	no viral genes detected
SRR3726706_6251||full	0.540	0	1964	No	2	0	1	Not-determined	0.0	no viral genes detected
SRR3726706_6824||full	0.555	0	2518	No	3	0	1	Low-quality	0.0	no viral genes detected
SRR3726706_14893||full	0.530	0	3321	No	2	2	0	Low-quality	0.0
SRR3726706_15407||full	0.640	0	1754	No	2	0	1	Not-determined	0.0	no viral genes detected
SRR3726706_15682||full	0.850	0	3840	No	2	1	0	Low-quality	0.0
SRR3726707_320||full	0.780	0	3009	No	2	0	0	Not-determined	0.0	no viral genes detected
SRR3726707_1692||full	0.660	0	4706	No	3	1	0	Low-quality	0.0
SRR3726707_2847||full	0.680	0	1917	No	2	0	1	Low-quality	0.0	no viral genes detected
SRR3726707_3558||full	0.520	0	6171	No	2	1	0	Low-quality	0.0
SRR3726707_4602||full	0.655	0	7512	No	2	1	0	Low-quality	0.0
SRR3726707_5497||full	0.630	0	5073	No	2	1	0	Low-quality	0.0
SRR3726707_10001||full	0.600	0	2561	No	2	0	1	Low-quality	0.0	no viral genes detected
SRR3726707_12772||full	0.560	0	3911	No	2	0	0	Not-determined	0.0	no viral genes detected
SRR3726707_13720||full	0.920	0	4119	No	3	0	1	Not-determined	0.0	no viral genes detected
SRR3738852_883||full	0.915	0	2171	No	2	0	0	Not-determined	0.0	no viral genes detected
SRR3738852_2555||full	0.735	0	4197	No	2	0	1	Low-quality	0.0	no viral genes detected
SRR3738852_7161||full	0.825	0	4370	No	2	0	1	Low-quality	0.0	no viral genes detected
SRR3738852_8731||full	0.670	0	4871	No	3	0	0	Not-determined	0.0	no viral genes detected
SRR3738852_8828||full	0.630	0	7741	No	2	1	0	Low-quality	0.0
SRR3738852_12129||full	0.805	0	7595	No	4	1	0	Low-quality	0.0
SRR3738852_12155||full	0.635	0	1699	No	3	0	0	Low-quality	0.0	no viral genes detected
SRR3738852_14884||full	0.830	0	1703	No	2	0	1	Not-determined	0.0	no viral genes detected
SRR3738852_15553||full	0.760	0	2825	No	3	0	0	Not-determined	0.0	no viral genes detected
SRR3738852_19238||full	0.830	0	3311	No	6	0	0	Not-determined	0.0	no viral genes detected
SRR3738852_20770||full	0.500	0	1952	No	3	0	0	Not-determined	0.0	no viral genes detected
SRR3738852_20904||full	0.835	0	1883	No	2	0	0	Not-determined	0.0	no viral genes detected
SRR3738852_21099||full	0.660	0	1761	No	2	1	0	Low-quality	0.0
SRR3738852_23236||full	0.625	0	3368	No	2	1	0	Low-quality	0.0
SRR3738852_27716||full	0.700	0	1728	No	4	1	0	Low-quality	0.0
SRR3738852_37016||full	0.685	0	7793	No	2	1	0	Low-quality	0.0
SRR3738852_43632||full	0.830	0	2035	No	3	0	1	Not-determined	0.0	no viral genes detected
SRR3738852_47901||full	0.645	0	5309	No	2	0	1	Low-quality	0.0	no viral genes detected
SRR4190242_193||full	0.615	0	1589	No	2	0	0	Not-determined	0.0	no viral genes detected
SRR4190242_2241||full	0.685	0	4370	No	2	0	1	Low-quality	0.0	no viral genes detected
SRR4190242_2317||full	0.730	0	7682	No	2	1	0	Low-quality	0.0
SRR4190242_2767||full	0.760	0	2013	No	3	1	0	Low-quality	0.0
SRR4190242_3141||full	0.550	0	2089	No	2	0	1	Not-determined	0.0	no viral genes detected
SRR4190242_3289||full	0.590	0	1705	No	2	0	1	Not-determined	0.0	no viral genes detected
SRR4190242_3324||full	0.615	0	2690	No	2	0	0	Not-determined	0.0	no viral genes detected
SRR4190242_3453||full	0.570	0	1945	No	2	0	1	Not-determined	0.0	no viral genes detected
SRR4190242_3622||full	0.980	0	1855	No	2	0	1	Not-determined	0.0	no viral genes detected
SRR4190242_5025||full	0.610	0	3603	No	2	0	1	Low-quality	0.0	no viral genes detected
SRR4190242_5338||full	0.870	0	3037	No	2	0	1	Not-determined	0.0	no viral genes detected
SRR4190242_5733||full	0.610	0	1750	No	2	1	0	Low-quality	0.0
SRR4190242_5777||full	0.695	0	2677	No	2	1	0	Low-quality	0.0
SRR4190242_5841||full	0.510	0	4897	No	3	0	1	Not-determined	0.0	no viral genes detected
SRR4190242_6272||full	0.650	0	2055	No	2	0	0	Not-determined	0.0	no viral genes detected
SRR4190242_6695||full	0.565	0	2332	No	2	0	0	Not-determined	0.0	no viral genes detected
SRR4190242_7368||full	0.540	0	3610	No	2	0	0	Low-quality	0.0	no viral genes detected
SRR4190242_8151||full	0.625	0	3218	No	5	1	0	Low-quality	0.0
SRR4190242_8314||full	0.515	0	2053	No	3	0	0	Not-determined	0.0	no viral genes detected
SRR4190242_8330||full	0.570	0	3582	No	3	1	0	Not-determined	0.0
SRR4190242_8368||full	0.645	0	4001	No	3	0	0	Not-determined	0.0	no viral genes detected
SRR4190242_9243||full	0.560	0	1800	No	2	0	1	Not-determined	0.0	no viral genes detected
SRR4190242_9803||full	0.650	0	1774	No	2	0	0	Not-determined	0.0	no viral genes detected
SRR4190242_9960||full	0.945	0	3107	No	2	0	0	Not-determined	0.0	no viral genes detected
SRR4190242_11316||full	0.510	0	3118	No	3	0	1	Not-determined	0.0	no viral genes detected
SRR4190242_12210||full	0.610	0	2421	No	2	0	1	Not-determined	0.0	no viral genes detected
SRR4190242_13853||full	0.545	0	3307	No	3	0	0	Not-determined	0.0	no viral genes detected
SRR4190242_13882||full	0.510	0	3578	No	3	0	0	Not-determined	0.0	no viral genes detected
SRR4190242_15053||full	0.840	0	10923	No	3	0	1	Not-determined	0.0	no viral genes detected
SRR4190242_15964||full	0.745	0	2489	No	2	0	0	Low-quality	0.0	no viral genes detected
SRR4190242_16409||full	0.630	0	2329	No	2	0	1	Not-determined	0.0	no viral genes detected
SRR4190242_18858||full	0.560	0	3541	No	2	1	0	Low-quality	0.0
SRR4190242_19337||full	0.570	0	1888	No	2	0	1	Not-determined	0.0	no viral genes detected
SRR4190242_21405||full	0.555	0	3052	No	2	0	1	Not-determined	0.0	no viral genes detected
SRR4190242_21565||full	0.640	0	3452	No	2	0	1	Not-determined	0.0	no viral genes detected
SRR4190242_30378||full	0.670	0	7567	No	2	1	0	Low-quality	0.0
SRR4190242_37014||full	0.735	0	11070	No	2	0	1	Not-determined	0.0	no viral genes detected
SRR4190242_41501||full	0.560	0	3578	No	3	0	0	Low-quality	0.0	no viral genes detected
SRR4190242_44354||full	0.840	0	3421	No	4	0	0	Not-determined	0.0	no viral genes detected
SRR4190242_45657||full	0.905	0	1782	No	1	1	0	Low-quality	0.0
SRR4190242_48638||full	0.665	0	3236	No	3	0	1	Not-determined	0.0	no viral genes detected
SRR4190242_50476||full	0.660	0	1616	No	2	1	0	Low-quality	0.0
SRR5527414_1308||full	0.695	0	2292	No	2	0	1	Not-determined	0.0	no viral genes detected
SRR5527414_10733||full	0.580	0	2101	No	2	0	1	Not-determined	0.0	no viral genes detected
SRR5527414_11749||full	0.710	0	3135	No	2	0	0	Low-quality	0.0	no viral genes detected
SRR5527414_15387||full	0.755	0	1747	No	2	0	1	Not-determined	0.0	no viral genes detected
SRR6875315_1115||full	0.615	0	4847	No	2	0	1	Not-determined	0.0	no viral genes detected
SRR6875315_1298||full	0.810	0	5276	No	4	0	1	Not-determined	0.0	no viral genes detected
SRR6875315_1499||full	0.650	0	2767	No	2	0	1	Not-determined	0.0	no viral genes detected
SRR6875315_1674||full	0.905	0	4268	No	3	0	0	Not-determined	0.0	no viral genes detected
SRR6875315_2026||full	0.700	0	2137	No	2	0	1	Not-determined	0.0	no viral genes detected
SRR6875316_1408||full	0.670	0	2102	No	2	0	0	Not-determined	0.0	no viral genes detected
SRR6875316_1726||full	0.600	0	1926	No	3	0	0	Not-determined	0.0	no viral genes detected
SRR6875316_1998||full	0.720	0	4301	No	2	1	0	Low-quality	0.0
SRR6875317_88||full	0.890	0	2701	No	2	0	1	Not-determined	0.0	no viral genes detected
SRR6875317_9103||full	0.855	0	2254	No	2	0	0	Not-determined	0.0	no viral genes detected
SRR6875317_18445||full	0.790	0	2686	No	2	0	0	Not-determined	0.0	no viral genes detected
SRR6875317_30985||full	0.500	0	2318	No	2	0	0	Not-determined	0.0	no viral genes detected
SRR6875318_1627||full	0.735	0	7272	No	2	0	1	Low-quality	0.0	no viral genes detected
SRR6875318_6698||full	0.830	0	5586	No	2	0	1	Not-determined	0.0	no viral genes detected
SRR6875319_627||full	0.545	0	2208	No	2	0	0	Not-determined	0.0	no viral genes detected
SRR6875319_768||full	0.535	0	1619	No	2	0	0	Not-determined	0.0	no viral genes detected
SRR6875319_1269||full	0.845	0	2495	No	2	0	1	Not-determined	0.0	no viral genes detected
SRR6875319_1646||full	0.715	0	1740	No	2	0	0	Not-determined	0.0	no viral genes detected
SRR6875319_2062||full	0.580	0	2678	No	2	0	0	Not-determined	0.0	no viral genes detected
SRR6875319_2800||full	0.555	0	2012	No	3	0	0	Not-determined	0.0	no viral genes detected
SRR6875319_4202||full	0.810	0	2064	No	2	0	1	Not-determined	0.0	no viral genes detected
SRR6875319_6564||full	0.710	0	1864	No	2	1	0	Low-quality	0.0
SRR6875319_7748||full	0.585	0	2977	No	4	0	1	Not-determined	0.0	no viral genes detected
SRR6875319_8170||full	0.870	0	3101	No	2	0	1	Not-determined	0.0	no viral genes detected
SRR6875319_10041||full	0.840	0	3009	No	2	0	1	Not-determined	0.0	no viral genes detected
SRR6894129_1011||full	0.550	0	2456	No	2	0	0	Not-determined	0.0	no viral genes detected
SRR6894129_1738||full	0.645	0	2425	No	2	0	1	Not-determined	0.0	no viral genes detected
SRR6894129_4278||full	0.630	0	5084	No	2	0	1	Not-determined	0.0	no viral genes detected
SRR6894129_4455||full	0.510	0	2790	No	2	0	1	Not-determined	0.0	no viral genes detected
SRR6894129_9978||full	0.835	0	1948	No	2	0	0	Not-determined	0.0	no viral genes detected
SRR6894129_10145||full	0.545	0	4946	No	2	0	1	Not-determined	0.0	no viral genes detected
SRR6894129_11342||full	0.575	0	2948	No	2	0	1	Not-determined	0.0	no viral genes detected
SRR6894130_757||full	0.515	0	1890	No	2	0	1	Not-determined	0.0	no viral genes detected
SRR6894130_1630||full	0.790	0	2816	No	2	0	1	Not-determined	0.0	no viral genes detected
SRR6894131_598||full	0.690	0	1507	No	2	0	1	Low-quality	0.0	no viral genes detected
SRR6894131_1753||full	0.720	0	1927	No	3	0	1	Not-determined	0.0	no viral genes detected
SRR6894131_4772||full	0.905	0	1515	No	2	1	0	Low-quality	0.0
SRR6894131_12044||full	0.610	0	1847	No	2	0	1	Not-determined	0.0	no viral genes detected
SRR3726693_5372||full	0.935	2	1757	No	2	0	0	Not-determined	0.0	no viral genes detected
SRR1950940_9119||lt2gene	nan	1	3164	No	2	0	1	Not-determined	0.0	no viral genes detected
SRR1950948_1419||lt2gene	nan	1	2132	No	3	0	1	Not-determined	0.0	no viral genes detected
SRR1950948_28126||lt2gene	nan	1	5379	No	2	1	0	Low-quality	0.0
SRR1950948_38692||lt2gene	nan	1	2731	No	2	0	0	Not-determined	0.0	no viral genes detected
SRR1950951_1091||lt2gene	nan	1	3076	No	2	0	1	Low-quality	0.0	no viral genes detected
SRR1950951_5889||lt2gene	nan	1	3564	No	4	0	1	Not-determined	0.0	no viral genes detected
SRR1950951_35903||lt2gene	nan	1	1692	No	2	0	0	Not-determined	0.0	no viral genes detected
SRR1950953_981||lt2gene	nan	1	1740	No	2	1	0	Low-quality	0.0
SRR1950953_13115||lt2gene	nan	1	2662	No	2	0	1	Not-determined	0.0	no viral genes detected
SRR1950953_13878||lt2gene	nan	1	1857	No	2	0	1	Not-determined	0.0	no viral genes detected
SRR1950953_15601||lt2gene	nan	1	1712	No	2	0	0	Not-determined	0.0	no viral genes detected
SRR1950953_27212||lt2gene	nan	1	6836	No	4	0	1	Low-quality	0.0	no viral genes detected
SRR3726693_131||lt2gene	nan	1	4702	No	3	1	0	Low-quality	0.0
SRR3726693_286||lt2gene	nan	1	1986	No	2	0	0	Not-determined	0.0	no viral genes detected
SRR3726693_2270||lt2gene	nan	1	3837	No	2	0	1	Low-quality	0.0	no viral genes detected
SRR3726693_2271||lt2gene	nan	1	2043	No	2	0	0	Not-determined	0.0	no viral genes detected
SRR3726693_3931||lt2gene	nan	1	1924	No	2	0	1	Low-quality	0.0	no viral genes detected
SRR3726693_6245||lt2gene	nan	1	2214	No	2	0	1	Not-determined	0.0	no viral genes detected
SRR3726695_15530||lt2gene	nan	1	4246	No	3	0	0	Not-determined	0.0	no viral genes detected
SRR3726696_22111||lt2gene	nan	1	1878	No	2	0	1	Not-determined	0.0	no viral genes detected
SRR3726698_7138||lt2gene	nan	1	2396	No	2	0	0	Not-determined	0.0	no viral genes detected
SRR3726699_38607||lt2gene	nan	1	3751	No	2	1	0	Low-quality	0.0
SRR3726705_1238||lt2gene	nan	1	3438	No	2	0	1	Not-determined	0.0	no viral genes detected
SRR4190242_6357||lt2gene	nan	1	2508	No	2	1	0	Low-quality	0.0
