# Supplementary material for: Tracing RNA viruses associated with Nudibranchia gastropods
Source: PeerJ. 2022 May 13;10:e13410. doi: 10.7717/peerj.13410 (PMC9109684; doi:10.7717/peerj.13410)
Supplement: Supplemental Information 2 — For the 552 putative viral contigs, their identification by blastx, palmscan and Virsorter2 was reported together with the CAT taxonomic classification (number of annotated ORFs, superkingdom, phylum, class, order, family, genus and species. [file peerj-10-13410-s002.xlsx]

## Sheet: S.Table2
# contig	blastx	palmscan	Virsorter2	reason	superkingdom	phylum	class	order	family	genus	species
SRR1950949_18608	X		X	based on 1/2 ORFs	Viruses	Cossaviricota	Quintoviricetes: 1.00	Piccovirales: 1.00	Parvoviridae: 1.00	NA	Parvoviridae sp.: 1.00
SRR3738852_52046	X			based on 1/1 ORFs	Viruses	Cossaviricota	Quintoviricetes: 1.00	Piccovirales: 1.00	Parvoviridae: 1.00	NA	Parvoviridae sp.: 1.00
SRR3726699_38607	X	X	X	based on 2/2 ORFs
SRR3726705_73652	X			based on 1/1 ORFs	Viruses	Cossaviricota	Quintoviricetes: 1.00	Piccovirales: 1.00	Parvoviridae: 1.00	NA	Parvoviridae sp.: 1.00
SRR3726696_7436	X		X	based on 1/2 ORFs
SRR3726704_86709	X			based on 1/1 ORFs	Viruses	Cossaviricota	Quintoviricetes: 1.00	Piccovirales: 1.00	Parvoviridae: 1.00	NA	Parvoviridae sp.: 1.00
SRR3726701_33098	X			based on 1/1 ORFs	Viruses	Cossaviricota	Quintoviricetes: 1.00	Piccovirales: 1.00	Parvoviridae: 1.00	NA	Parvoviridae sp.: 1.00
SRR3726701_23013	X			based on 1/1 ORFs	Viruses	Cossaviricota	Quintoviricetes: 1.00	Piccovirales: 1.00	Parvoviridae: 1.00	NA	Parvoviridae sp.: 1.00
SRR3726693_5372	X		X	based on 3/3 ORFs
SRR3726699_77129	X			based on 1/1 ORFs	Viruses	Cossaviricota	Quintoviricetes: 1.00	Piccovirales: 1.00	Parvoviridae: 1.00	NA	Parvoviridae sp.: 1.00
SRR3726699_74797	X			based on 1/1 ORFs	Viruses	Cossaviricota	Quintoviricetes: 1.00	Piccovirales: 1.00	Parvoviridae: 1.00	NA	Parvoviridae sp.: 1.00
SRR3726699_37428	X			based on 1/1 ORFs	Viruses	Cossaviricota	Quintoviricetes: 1.00	Piccovirales: 1.00	Parvoviridae: 1.00	NA	Parvoviridae sp.: 1.00
SRR3726699_28792	X			based on 1/1 ORFs	Viruses	Cossaviricota	Quintoviricetes: 1.00	Piccovirales: 1.00	Parvoviridae: 1.00	NA	Parvoviridae sp.: 1.00
SRR3726699_17049	X			based on 1/2 ORFs	Viruses	Cossaviricota	Quintoviricetes: 1.00	Piccovirales: 1.00	Parvoviridae: 1.00	NA	Parvoviridae sp.: 1.00
SRR3726699_13226	X			based on 1/3 ORFs	Viruses	Cossaviricota	Quintoviricetes: 1.00	Piccovirales: 1.00	Parvoviridae: 1.00	NA	Parvoviridae sp.: 1.00
SRR3726699_12345	X			based on 1/1 ORFs	Viruses	Cossaviricota	Quintoviricetes: 1.00	Piccovirales: 1.00	Parvoviridae: 1.00	NA	Parvoviridae sp.: 1.00
SRR3726696_39815	X			based on 1/1 ORFs	Viruses	Cossaviricota	Quintoviricetes: 1.00	Piccovirales: 1.00	Parvoviridae: 1.00	NA	Parvoviridae sp.: 1.00
SRR3726693_54020	X			based on 1/1 ORFs	Viruses	Cossaviricota	Quintoviricetes: 1.00	Piccovirales: 1.00	Parvoviridae: 1.00	NA	Parvoviridae sp.: 1.00
SRR3726693_40620	X			based on 1/1 ORFs	Viruses	Cossaviricota	Quintoviricetes: 1.00	Piccovirales: 1.00	Parvoviridae: 1.00	NA	Parvoviridae sp.: 1.00
SRR3726693_33076	X			based on 1/3 ORFs	Viruses	Cossaviricota	Quintoviricetes: 1.00	Piccovirales: 1.00	Parvoviridae: 1.00	NA	Parvoviridae sp.: 1.00
SRR3726693_32832	X			based on 1/2 ORFs	Viruses	Cossaviricota	Quintoviricetes: 1.00	Piccovirales: 1.00	Parvoviridae: 1.00	NA	Parvoviridae sp.: 1.00
SRR3726693_24160	X			based on 1/2 ORFs	Viruses	Cossaviricota	Quintoviricetes: 1.00	Piccovirales: 1.00	Parvoviridae: 1.00	NA	Parvoviridae sp.: 1.00
SRR3726693_19871	X			based on 1/1 ORFs	Viruses	Cossaviricota	Quintoviricetes: 1.00	Piccovirales: 1.00	Parvoviridae: 1.00	NA	Parvoviridae sp.: 1.00
SRR3726693_15881	X			based on 1/1 ORFs	Viruses	Cossaviricota	Quintoviricetes: 1.00	Piccovirales: 1.00	Parvoviridae: 1.00	NA	Parvoviridae sp.: 1.00
SRR3726692_53196	X			based on 1/1 ORFs	Viruses	Cossaviricota	Quintoviricetes: 1.00	Piccovirales: 1.00	Parvoviridae: 1.00	NA	Parvoviridae sp.: 1.00
SRR1950951_20357	X			based on 1/3 ORFs	Viruses	Cossaviricota	Quintoviricetes: 1.00	Piccovirales: 1.00	Parvoviridae: 1.00	NA	Parvoviridae sp.: 1.00
SRR1950950_23884	X			based on 1/1 ORFs	Viruses	Cossaviricota	Quintoviricetes: 1.00	Piccovirales: 1.00	Parvoviridae: 1.00	NA	Parvoviridae sp.: 1.00
SRR1950949_2466	X			based on 1/2 ORFs	Viruses	Cossaviricota	Quintoviricetes: 1.00	Piccovirales: 1.00	Parvoviridae: 1.00	NA	Parvoviridae sp.: 1.00
SRR1950946_21557	X			based on 1/1 ORFs	Viruses	Cossaviricota	Quintoviricetes: 1.00	Piccovirales: 1.00	Parvoviridae: 1.00	NA	Parvoviridae sp.: 1.00
SRR1950943_39534	X			based on 1/1 ORFs	Viruses	Cossaviricota	Quintoviricetes: 1.00	Piccovirales: 1.00	Parvoviridae: 1.00	NA	Parvoviridae sp.: 1.00
SRR1950943_11727	X			based on 1/2 ORFs	Viruses	Cossaviricota	Quintoviricetes: 1.00	Piccovirales: 1.00	Parvoviridae: 1.00	NA	Parvoviridae sp.: 1.00
SRR3726698_7138		X	X	no hits to database
SRR6894131_1753			X	based on 1/2 ORFs	Eukaryota	Mollusca	Gastropoda: 1.00	Aplysiida: 1.00	Aplysiidae: 1.00	Aplysia: 1.00	Aplysia californica: 1.00
SRR6894131_12044			X	based on 2/2 ORFs	Eukaryota	Mollusca	Gastropoda: 1.00
SRR6894129_1738			X	based on 1/3 ORFs	Eukaryota	Mollusca	Gastropoda: 1.00	Aplysiida: 1.00	Aplysiidae: 1.00	Aplysia: 1.00	Aplysia californica: 1.00
SRR6875319_6564			X	based on 1/2 ORFs	Eukaryota
SRR6875319_1269			X	based on 1/2 ORFs	Eukaryota
SRR6875317_30985			X	based on 1/2 ORFs	Eukaryota	Haptista	Haptophyta: 1.00
SRR5527414_1308			X	based on 1/2 ORFs	Eukaryota
SRR4190242_7368			X	based on 1/2 ORFs	Eukaryota	Mollusca	Bivalvia: 1.00	Ostreida: 1.00	Ostreidae: 1.00	Crassostrea: 1.00
SRR4190242_5733			X	based on 1/2 ORFs	Eukaryota	Mollusca	Gastropoda: 1.00
SRR4190242_3622			X	based on 1/2 ORFs	Eukaryota	Mollusca	Gastropoda: 1.00	Aplysiida: 1.00	Aplysiidae: 1.00	Aplysia: 1.00	Aplysia californica: 1.00
SRR4190242_3453			X	based on 1/2 ORFs	Eukaryota	Mollusca
SRR4190242_15053			X	based on 1/2 ORFs	Eukaryota	Mollusca	Gastropoda: 1.00	NA	Plakobranchidae: 1.00	Elysia: 1.00	Elysia chlorotica: 1.00
SRR3738852_23236			X	based on 1/3 ORFs	Eukaryota	Mollusca	Gastropoda: 1.00
SRR3738852_20904			X	based on 4/5 ORFs	Eukaryota	Mollusca	Gastropoda: 0.82	Architaenioglossa: 0.82	Ampullariidae: 0.82	Pomacea: 0.82	Pomacea canaliculata: 0.82
SRR3738852_12155			X	based on 1/2 ORFs	Eukaryota	Mollusca	Gastropoda: 1.00	Aplysiida: 1.00	Aplysiidae: 1.00	Aplysia: 1.00	Aplysia californica: 1.00
SRR3738852_12129			X	based on 1/2 ORFs	Eukaryota	Mollusca	Gastropoda: 1.00
SRR3726707_5497			X	based on 1/2 ORFs	Eukaryota	Mollusca	Gastropoda: 1.00	Aplysiida: 1.00	Aplysiidae: 1.00	Aplysia: 1.00	Aplysia californica: 1.00
SRR3726707_320			X	based on 1/2 ORFs	Eukaryota	Mollusca	Gastropoda: 1.00
SRR3726707_10001			X	based on 1/3 ORFs	Eukaryota
SRR3726706_4662			X	based on 1/3 ORFs	Eukaryota
SRR3726706_4377			X	based on 1/4 ORFs	Eukaryota	Mollusca	Gastropoda: 1.00
SRR3726706_2511			X	based on 1/2 ORFs	Eukaryota	Mollusca	Gastropoda: 1.00
SRR3726706_15682			X	based on 4/4 ORFs	Eukaryota
SRR3726706_15407			X	based on 1/2 ORFs	Eukaryota	Mollusca	Gastropoda: 1.00
SRR3726706_14893			X	based on 1/2 ORFs	Eukaryota	Mollusca	Gastropoda: 1.00
SRR3726705_4711			X	based on 1/2 ORFs	Eukaryota	Mollusca	Gastropoda: 1.00
SRR3726705_4060			X	based on 1/2 ORFs	Eukaryota	Mollusca
SRR3726705_4016			X	based on 1/2 ORFs	Eukaryota
SRR3726705_3738			X	based on 1/3 ORFs	Eukaryota	Mollusca	Gastropoda: 1.00
SRR3726705_2195			X	based on 1/2 ORFs	Eukaryota	Mollusca	Gastropoda: 1.00
SRR3726704_843			X	based on 1/3 ORFs	Eukaryota	Mollusca	Gastropoda: 1.00
SRR3726704_4719			X	based on 2/2 ORFs	Eukaryota	Mollusca	Gastropoda: 1.00
SRR3726704_1234			X	based on 10/10 ORFs	Eukaryota	Mollusca	Gastropoda: 0.61	Architaenioglossa: 0.61	Ampullariidae: 0.61	Pomacea: 0.61	Pomacea canaliculata: 0.61
SRR3726704_11174			X	based on 1/3 ORFs
SRR3726703_41923			X	no hits to database
SRR3726702_7235			X	based on 1/2 ORFs	Eukaryota	Mollusca
SRR3726701_4771			X	based on 2/2 ORFs	Eukaryota	Mollusca
SRR3726701_2855			X	based on 1/3 ORFs	Eukaryota	Mollusca	Gastropoda: 1.00
SRR3726700_6256			X	no hits to database
SRR3726700_2001			X	based on 1/2 ORFs	Eukaryota	Mollusca	Gastropoda: 1.00	Aplysiida: 1.00	Aplysiidae: 1.00	Aplysia: 1.00	Aplysia californica: 1.00
SRR3726700_10349			X	based on 1/2 ORFs	Eukaryota	Mollusca	Gastropoda: 1.00
SRR3726699_5310			X	based on 2/2 ORFs	Eukaryota	Mollusca	Gastropoda: 1.00
SRR3726699_16734			X	based on 1/2 ORFs	Eukaryota
SRR3726698_8019			X	based on 1/3 ORFs	Eukaryota	Mollusca	Gastropoda: 1.00	Aplysiida: 1.00	Aplysiidae: 1.00	Aplysia: 1.00	Aplysia californica: 1.00
SRR3726697_1085			X	based on 1/3 ORFs	Eukaryota	Mollusca	Gastropoda: 1.00
SRR3726697_1030			X	no hits to database
SRR3726696_6086			X	based on 5/5 ORFs	Eukaryota
SRR3726693_5136			X	based on 1/2 ORFs	Eukaryota	Mollusca	Gastropoda: 1.00
SRR3726693_24432			X	based on 1/2 ORFs	Eukaryota
SRR3726692_9964			X	based on 2/2 ORFs	Eukaryota	Mollusca	Bivalvia: 0.73
SRR3726692_538			X	based on 1/2 ORFs
SRR3726692_5347			X	based on 2/2 ORFs	Eukaryota
SRR3726692_1149			X	based on 1/2 ORFs
SRR1950954_17734			X	based on 1/4 ORFs	Eukaryota
SRR1950954_11678			X	based on 4/4 ORFs	Eukaryota	Mollusca	Gastropoda: 0.78	Architaenioglossa: 0.78	Ampullariidae: 0.78	Pomacea: 0.78	Pomacea canaliculata: 0.78
SRR1950943_10328	X			based on 1/4 ORFs	Viruses	Cossaviricota	Quintoviricetes: 1.00	Piccovirales: 1.00	Parvoviridae: 1.00	NA	Parvoviridae sp.: 1.00
SRR1950953_10577			X	based on 1/3 ORFs	Eukaryota	Mollusca	Gastropoda: 1.00	Aplysiida: 1.00	Aplysiidae: 1.00	Aplysia: 1.00	Aplysia californica: 1.00
SRR1950952_5620			X	based on 1/5 ORFs	Eukaryota	Mollusca	Gastropoda: 1.00	NA	Planorbidae: 1.00	Biomphalaria: 1.00	Biomphalaria glabrata: 1.00
SRR1950952_5505			X	based on 4/5 ORFs	Eukaryota	Mollusca	Gastropoda: 0.79	Architaenioglossa: 0.79	Ampullariidae: 0.79	Pomacea: 0.79	Pomacea canaliculata: 0.79
SRR1950952_2697			X	based on 4/4 ORFs	Eukaryota	Mollusca
SRR1950951_9200			X	based on 1/2 ORFs	Eukaryota	Mollusca	Gastropoda: 1.00
SRR1950951_6598			X	based on 1/2 ORFs	Eukaryota	Mollusca	Gastropoda: 1.00	Aplysiida: 1.00	Aplysiidae: 1.00	Aplysia: 1.00	Aplysia californica: 1.00
SRR1950951_2042			X	based on 1/3 ORFs	Eukaryota	Mollusca	Gastropoda: 1.00
SRR1950950_286			X	based on 1/2 ORFs	Eukaryota	Mollusca	Gastropoda: 1.00
SRR1950950_25270			X	based on 3/3 ORFs	Eukaryota	Mollusca	Gastropoda: 0.73	Architaenioglossa: 0.73	Ampullariidae: 0.73	Pomacea: 0.73	Pomacea canaliculata: 0.73
SRR1950950_2083			X	based on 1/2 ORFs	Eukaryota	Mollusca	Gastropoda: 1.00
SRR1950950_1279			X	based on 1/5 ORFs	Eukaryota	Mollusca	Gastropoda: 1.00	Aplysiida: 1.00	Aplysiidae: 1.00	Aplysia: 1.00	Aplysia californica: 1.00
SRR1950947_3094			X	based on 1/2 ORFs	Eukaryota	Mollusca	Gastropoda: 1.00
SRR1950947_17985			X	based on 1/2 ORFs	Eukaryota	Mollusca	Gastropoda: 1.00	Aplysiida: 1.00	Aplysiidae: 1.00	Aplysia: 1.00	Aplysia californica: 1.00
SRR1950946_6763			X	based on 1/2 ORFs	Eukaryota	Mollusca	Gastropoda: 1.00
SRR1950946_14593			X	based on 1/2 ORFs	Eukaryota	Mollusca	Gastropoda: 1.00	Aplysiida: 1.00	Aplysiidae: 1.00	Aplysia: 1.00	Aplysia californica: 1.00
SRR1950944_8813			X	based on 1/3 ORFs	Eukaryota	Mollusca
SRR1950943_5526			X	based on 4/5 ORFs	Eukaryota	Mollusca	Gastropoda: 0.77	Architaenioglossa: 0.77	Ampullariidae: 0.77	Pomacea: 0.77	Pomacea canaliculata: 0.77
SRR1950943_19571			X	based on 1/2 ORFs	Eukaryota	Mollusca	Gastropoda: 1.00	Aplysiida: 1.00	Aplysiidae: 1.00	Aplysia: 1.00	Aplysia californica: 1.00
SRR1950943_1636			X	based on 1/3 ORFs	Eukaryota	Mollusca	Gastropoda: 1.00	Aplysiida: 1.00	Aplysiidae: 1.00	Aplysia: 1.00	Aplysia californica: 1.00
SRR1950943_14324			X	based on 1/2 ORFs	Eukaryota	Mollusca	Gastropoda: 1.00	NA	Planorbidae: 1.00	Biomphalaria: 1.00	Biomphalaria glabrata: 1.00
SRR1950941_1804			X	based on 1/2 ORFs	Eukaryota	Mollusca	Gastropoda: 1.00
SRR1950940_5990			X	based on 1/2 ORFs	Eukaryota	Mollusca
SRR1950940_342			X	based on 1/2 ORFs	Eukaryota
SRR1950940_23			X	based on 1/3 ORFs	Eukaryota	Mollusca	Gastropoda: 1.00
SRR1950940_16173			X	based on 1/2 ORFs	Eukaryota	Mollusca	Gastropoda: 1.00
SRR1950939_9537			X	based on 1/3 ORFs	Eukaryota	Mollusca	Bivalvia: 1.00	Ostreida: 1.00	Ostreidae: 1.00	Crassostrea: 1.00	Crassostrea virginica: 1.00
SRR1950939_3019			X	based on 1/2 ORFs	Eukaryota	Mollusca	Gastropoda: 1.00
SRR1950939_10168			X	based on 1/2 ORFs	Eukaryota	Mollusca
SRR1721590_7856			X	based on 1/2 ORFs	Eukaryota	Mollusca
SRR1721590_20893			X	based on 1/2 ORFs	Eukaryota	Mollusca	Gastropoda: 1.00
SRR1721590_1544			X	based on 1/2 ORFs	Eukaryota
SRR1721590_1075			X	based on 1/2 ORFs	Eukaryota
SRR1719366_5215			X	based on 1/3 ORFs	Eukaryota	Mollusca
SRR1719366_5056			X	based on 1/2 ORFs	Eukaryota	Mollusca
SRR1719366_4907			X	based on 1/2 ORFs	Eukaryota	Mollusca	Gastropoda: 1.00
SRR1719366_4553			X	based on 2/2 ORFs	Eukaryota	Mollusca	Gastropoda: 1.00
SRR1719366_3650			X	based on 1/3 ORFs	Eukaryota	Mollusca	Gastropoda: 1.00	Aplysiida: 1.00	Aplysiidae: 1.00	Aplysia: 1.00	Aplysia californica: 1.00
SRR1719366_1885			X	based on 1/5 ORFs	Eukaryota	Mollusca	Gastropoda: 1.00
SRR1719366_15415			X	based on 2/3 ORFs	Eukaryota	Mollusca	Gastropoda: 1.00
SRR1719366_10276			X	based on 1/2 ORFs	Eukaryota	Mollusca	Gastropoda: 1.00	Aplysiida: 1.00	Aplysiidae: 1.00	Aplysia: 1.00	Aplysia californica: 1.00
SRR1950940_9374	X			based on 1/1 ORFs	Viruses	Cossaviricota	Quintoviricetes: 1.00	Piccovirales: 1.00	Parvoviridae: 1.00	NA	Parvoviridae sp.: 1.00
SRR1950940_7621	X			based on 1/5 ORFs	Viruses	Cossaviricota	Quintoviricetes: 1.00	Piccovirales: 1.00	Parvoviridae: 1.00	NA	Parvoviridae sp.: 1.00
SRR6894132_26681	X			based on 1/1 ORFs
SRR6894132_16941	X			based on 2/2 ORFs
SRR1950940_7401	X			based on 1/4 ORFs	Viruses	Cossaviricota	Quintoviricetes: 1.00	Piccovirales: 1.00	Parvoviridae: 1.00	NA	Parvoviridae sp.: 1.00
SRR1950940_7048	X			based on 1/2 ORFs	Viruses	Cossaviricota	Quintoviricetes: 1.00	Piccovirales: 1.00	Parvoviridae: 1.00	NA	Parvoviridae sp.: 1.00
SRR6894129_2191	X			based on 1/1 ORFs
SRR6894129_10334	X			based on 2/4 ORFs	Bacteria	Bacteroidetes
SRR1950939_27496	X			based on 1/1 ORFs	Viruses	Cossaviricota	Quintoviricetes: 1.00	Piccovirales: 1.00	Parvoviridae: 1.00	NA	Parvoviridae sp.: 1.00
SRR6875317_28362	X			based on 1/1 ORFs
SRR1950947_6570	X			based on 1/2 ORFs	Viruses	Cressdnaviricota	Arfiviricetes: 1.00	Cirlivirales: 1.00	Circoviridae: 1.00	NA	Palaemonetes sp. common grass shrimp associated circular virus: 1.00
SRR1950948_38692	X	X	X	based on 1/1 ORFs	Viruses	Kitrinoviricota	Alsuviricetes: 1.00	Hepelivirales: 1.00	Hepeviridae: 1.00	NA	Barns Ness breadcrumb sponge hepe-like virus 2: 1.00
SRR1950951_36758	X			based on 1/1 ORFs	Viruses	Kitrinoviricota	Alsuviricetes: 1.00	Martellivirales: 1.00	Bromoviridae: 1.00	Ilarvirus: 1.00
SRR1950951_36074	X			based on 1/2 ORFs	Viruses	Kitrinoviricota	Alsuviricetes: 1.00	Martellivirales: 1.00
SRR5527414_45334	X			no hits to database
SRR5527414_42658	X			no hits to database
SRR5527414_41710	X			no hits to database
SRR1950948_90972	X			based on 1/1 ORFs	Viruses	Kitrinoviricota	Alsuviricetes: 1.00	Hepelivirales: 1.00	Hepeviridae: 1.00	NA	Barns Ness breadcrumb sponge hepe-like virus 2: 1.00
SRR1950948_88092	X			based on 1/1 ORFs	Viruses	Kitrinoviricota	Alsuviricetes: 1.00	Hepelivirales: 1.00	Hepeviridae: 1.00	NA	Barns Ness breadcrumb sponge hepe-like virus 2: 1.00
SRR1950948_85344	X			based on 1/1 ORFs	Viruses	Kitrinoviricota	Alsuviricetes: 1.00	Hepelivirales: 1.00	Hepeviridae: 1.00	NA	Barns Ness breadcrumb sponge hepe-like virus 2: 1.00
SRR1950948_78242	X			based on 1/1 ORFs	Viruses	Kitrinoviricota	Alsuviricetes: 1.00	Hepelivirales: 1.00	Hepeviridae: 1.00
SRR1950948_52799	X			based on 1/1 ORFs	Viruses	Kitrinoviricota	Alsuviricetes: 1.00	Hepelivirales: 1.00	Hepeviridae: 1.00	NA	Barns Ness breadcrumb sponge hepe-like virus 2: 1.00
SRR1950948_44272	X			based on 2/2 ORFs	Viruses	Kitrinoviricota	Alsuviricetes: 1.00	Hepelivirales: 1.00	Hepeviridae: 1.00	NA	Barns Ness breadcrumb sponge hepe-like virus 2: 1.00
SRR5527414_27442	X			no hits to database
SRR1950948_35579	X			based on 1/1 ORFs	Viruses	Kitrinoviricota	Alsuviricetes: 1.00	Hepelivirales: 1.00	Hepeviridae: 1.00	NA	Barns Ness breadcrumb sponge hepe-like virus 2: 1.00
SRR5527414_26306	X			based on 1/1 ORFs
SRR5527414_25843	X			no hits to database
SRR1950948_32171	X			based on 1/1 ORFs	Viruses	Kitrinoviricota	Alsuviricetes: 1.00	Hepelivirales: 1.00	Hepeviridae: 1.00	NA	Barns Ness breadcrumb sponge hepe-like virus 1: 1.00
SRR1950948_27787	X			based on 1/1 ORFs	Viruses	Kitrinoviricota	Alsuviricetes: 1.00	Hepelivirales: 1.00	Hepeviridae: 1.00	NA	Barns Ness breadcrumb sponge hepe-like virus 1: 1.00
SRR1950948_21549	X			based on 1/1 ORFs	Viruses	Kitrinoviricota	Alsuviricetes: 1.00	Hepelivirales: 1.00	Hepeviridae: 1.00	NA	Barns Ness breadcrumb sponge hepe-like virus 2: 1.00
SRR1950948_15379	X			based on 1/1 ORFs	Viruses	Kitrinoviricota	Alsuviricetes: 1.00	Hepelivirales: 1.00	Hepeviridae: 1.00	NA	Barns Ness breadcrumb sponge hepe-like virus 1: 1.00
SRR1719366_63324	X			based on 1/1 ORFs	Viruses	Lenarviricota	Allassoviricetes: 1.00	Levivirales: 1.00	Leviviridae: 1.00	NA	Leviviridae sp.: 1.00
SRR5527414_19278	X			based on 1/1 ORFs	Bacteria	Proteobacteria	Betaproteobacteria: 1.00	NA	NA	NA	Betaproteobacteria bacterium: 1.00
SRR1719366_63323	X			based on 1/1 ORFs	Viruses	Lenarviricota	Allassoviricetes: 1.00	Levivirales: 1.00	Leviviridae: 1.00	NA	Leviviridae sp.: 1.00
SRR1719366_53205	X			based on 1/1 ORFs	Viruses	Lenarviricota	Allassoviricetes: 1.00	Levivirales: 1.00	Leviviridae: 1.00	NA	Leviviridae sp.: 1.00
SRR1719366_44980	X	X		based on 1/1 ORFs	Viruses	Lenarviricota	Allassoviricetes: 1.00	Levivirales: 1.00	Leviviridae: 1.00	NA	Leviviridae sp.: 1.00
SRR1719366_2825	X			based on 1/1 ORFs	Viruses	Lenarviricota	Allassoviricetes: 1.00	Levivirales: 1.00	Leviviridae: 1.00	NA	Leviviridae sp.: 1.00
SRR3726693_6245	X	X	X	based on 1/1 ORFs	Viruses	NA	NA	NA	NA	NA	Beihai picorna-like virus 56: 1.00
SRR3726693_3931	X	X	X	based on 1/2 ORFs	Viruses	NA	NA	NA	NA	NA	Wenzhou picorna-like virus 46: 1.00
SRR3726693_286	X	X	X	based on 1/1 ORFs	Viruses	NA	NA	NA	NA	NA	Wuhan snail virus 2: 1.00
SRR3726693_23	X	X	X	based on 2/3 ORFs	Viruses	NA	NA	NA	NA	NA	Beihai picorna-like virus 75: 1.00
SRR4190242_76998	X			based on 1/1 ORFs	Bacteria	Firmicutes	Clostridia: 1.00	Clostridiales: 1.00	Ruminococcaceae: 1.00	NA	Ruminococcaceae bacterium: 1.00
SRR3726693_2271	X		X	based on 1/1 ORFs	Viruses	NA	NA	NA	NA	NA	Beihai picorna-like virus 75: 1.00
SRR4190242_71460	X			based on 1/1 ORFs	Eukaryota	NA	Dinophyceae: 1.00	Suessiales: 1.00	Symbiodiniaceae: 1.00	Symbiodinium: 1.00	Symbiodinium microadriaticum: 1.00
SRR3726693_2270	X		X	based on 1/1 ORFs	Viruses	NA	NA	NA	NA	NA	Beihai picorna-like virus 75: 1.00
SRR4190242_48460	X			based on 2/3 ORFs	Bacteria	Bacteroidetes	Flavobacteriia: 0.56	Flavobacteriales: 0.56	Flavobacteriaceae: 0.56	Psychroserpens: 0.56	Psychroserpens sp.: 0.56
SRR4190242_42490	X			based on 1/1 ORFs
SRR3726693_131	X	X	X	based on 2/2 ORFs	Viruses	NA	NA	NA	NA	NA	Beihai picorna-like virus 75: 1.00
SRR4190242_126484	X			based on 1/1 ORFs	Bacteria
SRR1950953_981	X	X	X	based on 1/1 ORFs	Viruses	NA	NA	NA	NA	NA	Wenzhou picorna-like virus 46: 1.00
SRR1950953_7108	X	X	X	based on 2/2 ORFs	Viruses	NA	NA	NA	NA	NA	Beihai picorna-like virus 75: 1.00
SRR1950953_444	X	X	X	based on 2/2 ORFs	Viruses	NA	NA	NA	NA	NA	Beihai picorna-like virus 75: 1.00
SRR1950953_226	X	X	X	based on 1/7 ORFs	Viruses	NA	NA	NA	NA	NA	Beihai charybdis crab virus 1: 1.00
SRR3738852_180	X			based on 1/1 ORFs	Eukaryota
SRR1950953_13878	X		X	based on 1/1 ORFs	Viruses	NA	NA	NA	NA	NA	Beihai picorna-like virus 110: 1.00
SRR3726707_68013	X			no hits to database
SRR1950942_4074	X	X	X	based on 2/4 ORFs	Viruses	NA	NA	NA	NA	NA	Wenzhou picorna-like virus 19: 1.00
SRR1950940_818	X	X	X	based on 2/2 ORFs	Viruses	NA	NA	NA	NA	NA	Beihai picorna-like virus 72: 0.59
SRR1950953_27212			X	based on 1/1 ORFs	Viruses	NA	NA	NA	NA	NA	Beihai picorna-like virus 110: 1.00
SRR5527414_12565	X			based on 1/1 ORFs	Viruses	NA	NA	NA	NA	NA	Wuhan millipede virus 3: 1.00
SRR3738852_75615	X			based on 1/1 ORFs	Viruses	NA	NA	NA	NA	NA	Burkholderiales phage 68_11: 1.00
SRR3726707_43267	X			based on 1/1 ORFs	Viruses	NA	NA	NA	NA	NA	Wuhan snail virus 2: 1.00
SRR3726707_40176	X			based on 1/1 ORFs	Viruses	NA	NA	NA	NA	NA	Wuhan snail virus 2: 1.00
SRR3726706_40551	X			based on 1/1 ORFs	Viruses	NA	NA	NA	NA	NA	Wenzhou picorna-like virus 28: 1.00
SRR3726706_245	X			based on 1/1 ORFs	Viruses	NA	NA	NA	NA	NA	Beihai picorna-like virus 123: 1.00
SRR3726705_4721	X			based on 1/2 ORFs	Viruses	NA	NA	NA	NA	NA	Changjiang picorna-like virus 5: 1.00
SRR3726705_21509	X			based on 1/1 ORFs	Viruses	NA	NA	NA	NA	NA	Warroolaba Creek virus 1: 1.00
SRR3726705_1385	X	X		based on 1/1 ORFs	Viruses	NA	NA	NA	NA	NA	Wuhan snail virus 2: 1.00
SRR3726702_64057	X			based on 1/1 ORFs	Viruses	NA	NA	NA	NA	NA	Wenzhou picorna-like virus 6: 1.00
SRR3726700_64738	X			based on 1/1 ORFs	Viruses	NA	NA	NA	NA	NA	Beihai picorna-like virus 75: 1.00
SRR3726700_61652	X			based on 1/1 ORFs	Viruses	NA	NA	NA	NA	NA	Wenzhou picorna-like virus 19: 1.00
SRR3726700_56612	X			based on 1/1 ORFs	Viruses	NA	NA	NA	NA	NA	Wenzhou picorna-like virus 19: 1.00
SRR3726700_54607	X			based on 1/1 ORFs	Viruses	NA	NA	NA	NA	NA	Wenzhou picorna-like virus 19: 1.00
SRR3726700_53074	X			based on 1/1 ORFs	Viruses	NA	NA	NA	NA	NA	Wenzhou picorna-like virus 19: 1.00
SRR3726700_46784	X			based on 1/1 ORFs	Viruses	NA	NA	NA	NA	NA	Wenzhou picorna-like virus 19: 1.00
SRR3726700_40750	X			based on 1/1 ORFs	Viruses	NA	NA	NA	NA	NA	Wenzhou picorna-like virus 19: 1.00
SRR3726705_56960	X			no hits to database
SRR3726700_21856	X			based on 2/2 ORFs	Viruses	NA	NA	NA	NA	NA	Beihai picorna-like virus 75: 1.00
SRR3726699_44841	X			based on 1/1 ORFs	Viruses	NA	NA	NA	NA	NA	Symbiodinium +ssRNA virus TR74740 c13_g1_i1: 1.00
SRR3726705_40732	X			based on 1/2 ORFs
SRR3726705_3803	X			no hits to database
SRR3726696_7437	X			based on 2/2 ORFs	Viruses	NA	NA	NA	NA	NA	Shayang ascaridia galli virus 2: 0.52
SRR3726705_37052	X			based on 1/1 ORFs
SRR3726696_30420	X			based on 1/1 ORFs	Viruses	NA	NA	NA	Adintoviridae: 1.00	NA	Astyanax tetra cavefish adintovirus: 1.00
SRR3726696_25154	X			based on 1/1 ORFs	Viruses	NA	NA	NA	NA	NA	Beihai picorna-like virus 66: 1.00
SRR3726705_35191	X			based on 1/2 ORFs	Bacteria	NA	NA	NA	NA	NA	bacterium: 1.00
SRR3726694_60161	X			based on 1/1 ORFs	Viruses	NA	NA	NA	Adintoviridae: 1.00	NA	Hydra adintovirus: 1.00
SRR3726693_7944	X			based on 1/1 ORFs	Viruses	NA	NA	NA	NA	NA	Beihai picorna-like virus 75: 1.00
SRR3726705_3157	X			based on 1/3 ORFs
SRR3726693_7943	X			based on 1/1 ORFs	Viruses	NA	NA	NA	NA	NA	Beihai picorna-like virus 75: 1.00
SRR3726693_67231	X			based on 1/1 ORFs	Viruses	NA	NA	NA	NA	NA	Beihai picorna-like virus 56: 1.00
SRR3726693_6635	X			based on 2/3 ORFs	Viruses	NA	NA	NA	Adintoviridae: 0.62	NA	Hydra adintovirus: 0.62
SRR3726693_64628	X			based on 1/1 ORFs	Viruses	NA	NA	NA	NA	NA	Beihai narna-like virus 14: 1.00
SRR3726693_6284	X			based on 1/2 ORFs	Viruses	NA	NA	NA	NA	NA	Beihai picorna-like virus 56: 1.00
SRR3726705_1322	X			based on 1/3 ORFs
SRR3726705_1097	X			based on 1/2 ORFs
SRR3726705_10857	X			based on 1/2 ORFs
SRR3726693_60582	X			based on 1/1 ORFs	Viruses	NA	NA	NA	NA	NA	Beihai narna-like virus 14: 1.00
SRR3726693_60070	X			based on 1/1 ORFs	Viruses	NA	NA	NA	NA	NA	Beihai picorna-like virus 56: 1.00
SRR3726704_61529	X			no hits to database
SRR3726693_553	X			based on 2/2 ORFs	Viruses	NA	NA	NA	NA	NA	Beihai picorna-like virus 75: 1.00
SRR3726704_46933	X			no hits to database
SRR3726693_46363	X			based on 1/1 ORFs	Viruses	NA	NA	NA	NA	NA	Beihai picorna-like virus 121: 1.00
SRR3726693_46	X			based on 1/1 ORFs	Viruses	NA	NA	NA	NA	NA	Beihai picorna-like virus 75: 1.00
SRR3726693_45516	X			based on 1/1 ORFs	Viruses	NA	NA	NA	NA	NA	Beihai picorna-like virus 56: 1.00
SRR3726693_39875	X			based on 1/1 ORFs	Viruses	NA	NA	NA	NA	NA	Beihai narna-like virus 14: 1.00
SRR3726693_35536	X			based on 1/1 ORFs	Viruses	NA	NA	NA	NA	NA	Beihai picorna-like virus 56: 1.00
SRR3726693_32137	X			based on 1/1 ORFs	Viruses	NA	NA	NA	NA	NA	Beihai picorna-like virus 56: 1.00
SRR3726693_3	X			based on 1/1 ORFs	Viruses	NA	NA	NA	NA	NA	Beihai picorna-like virus 75: 1.00
SRR3726703_36033	X			based on 1/1 ORFs
SRR3726693_2777	X			based on 1/1 ORFs	Viruses	NA	NA	NA	NA	NA	Beihai picorna-like virus 75: 1.00
SRR3726703_19518	X			based on 1/2 ORFs
SRR3726693_1985	X			based on 1/1 ORFs	Viruses	NA	NA	NA	NA	NA	Beihai picorna-like virus 75: 1.00
SRR3726693_17034	X			based on 1/1 ORFs	Viruses	NA	NA	NA	NA	NA	Beihai picorna-like virus 75: 1.00
SRR3726703_118589	X			based on 1/1 ORFs	Eukaryota	NA	Dinophyceae: 1.00	Suessiales: 1.00	Symbiodiniaceae: 1.00	Symbiodinium: 1.00	Symbiodinium microadriaticum: 1.00
SRR3726693_15430	X			based on 1/1 ORFs	Viruses	NA	NA	NA	NA	NA	Beihai picorna-like virus 75: 1.00
SRR3726693_14805	X			based on 1/1 ORFs	Viruses	NA	NA	NA	NA	NA	Beihai picorna-like virus 75: 1.00
SRR3726702_17363	X			based on 2/2 ORFs
SRR3726693_1480	X			based on 1/2 ORFs	Viruses	NA	NA	NA	NA	NA	Beihai picorna-like virus 75: 1.00
SRR3726693_1257	X			based on 1/1 ORFs	Viruses	NA	NA	NA	NA	NA	Beihai picorna-like virus 75: 1.00
SRR3726693_1256	X			based on 1/1 ORFs	Viruses	NA	NA	NA	NA	NA	Beihai picorna-like virus 75: 1.00
SRR3726701_10361	X			no hits to database
SRR3726693_1205	X			based on 1/1 ORFs	Viruses	NA	NA	NA	NA	NA	Beihai picorna-like virus 75: 1.00
SRR1950953_80208	X			based on 1/1 ORFs	Viruses	NA	NA	NA	NA	NA	Wenzhou picorna-like virus 19: 1.00
SRR1950953_72150	X			based on 1/1 ORFs	Viruses	NA	NA	NA	NA	NA	Wenling picorna-like virus 5: 1.00
SRR1950953_68650	X			based on 1/1 ORFs	Viruses	NA	NA	NA	NA	NA	Changjiang picorna-like virus 5: 1.00
SRR1950953_4690	X			based on 1/1 ORFs	Viruses	NA	NA	NA	NA	NA	Wenzhou picorna-like virus 19: 1.00
SRR1950953_41880	X			based on 1/1 ORFs	Viruses	NA	NA	NA	NA	NA	Beihai picorna-like virus 56: 1.00
SRR1950953_26591	X			based on 1/1 ORFs	Viruses	NA	NA	NA	NA	NA	Changjiang picorna-like virus 5: 1.00
SRR1950953_18753	X			based on 1/1 ORFs	Viruses	NA	NA	NA	NA	NA	Beihai picorna-like virus 109: 1.00
SRR1950953_13115	X	X		based on 1/1 ORFs	Viruses	NA	NA	NA	NA	NA	Wenzhou picorna-like virus 19: 1.00
SRR1950952_33274	X			based on 1/1 ORFs	Viruses	NA	NA	NA	NA	NA	Dragonfly larvae associated circular virus-10: 1.00
SRR1950951_103776	X			based on 1/1 ORFs	Viruses	NA	NA	NA	NA	NA	Burkholderiales phage 68_11: 1.00
SRR1950950_73351	X			based on 1/1 ORFs	Viruses	NA	NA	NA	NA	NA	Wuhan snail virus 2: 1.00
SRR3726699_97965	X			no hits to database
SRR3726699_94904	X			based on 1/1 ORFs
SRR1950950_41382	X			based on 1/1 ORFs	Viruses	NA	NA	NA	NA	NA	Wuhan snail virus 2: 1.00
SRR3726699_94350	X			based on 1/1 ORFs
SRR1950949_59621	X			based on 1/1 ORFs	Viruses	NA	NA	NA	NA	NA	Beihai sobemo-like virus 16: 1.00
SRR1950949_53430	X			based on 1/1 ORFs	Viruses	NA	NA	NA	NA	NA	Beihai sobemo-like virus 17: 1.00
SRR1950948_4576	X			based on 1/1 ORFs	Viruses	NA	NA	NA	NA	NA	Beihai picorna-like virus 107: 1.00
SRR3726699_84363	X			no hits to database
SRR1950948_1419	X	X		based on 1/1 ORFs	Viruses	NA	NA	NA	NA	NA	Beihai picorna-like virus 107: 1.00
SRR1950946_41618	X			based on 1/1 ORFs	Viruses	NA	NA	NA	NA	NA	Wenling picorna-like virus 6: 1.00
SRR3726699_79670	X			based on 1/1 ORFs
SRR1950944_72095	X			based on 1/1 ORFs	Viruses	NA	NA	NA	NA	NA	Halhan virus 3: 1.00
SRR1950944_44005	X			based on 1/1 ORFs	Viruses	NA	NA	NA	NA	NA	Halhan virus 3: 1.00
SRR1950944_39222	X			based on 1/1 ORFs	Viruses	NA	NA	NA	NA	NA	Halhan virus 3: 1.00
SRR1950943_63136	X			based on 2/2 ORFs	Viruses	NA	NA	NA	NA	NA	Burkholderiales phage 68_11: 0.69
SRR1950942_35189	X			based on 1/1 ORFs	Viruses	NA	NA	NA	NA	NA	Wenzhou picorna-like virus 19: 1.00
SRR3726699_57813	X			based on 2/3 ORFs
SRR1950942_34328	X			based on 1/1 ORFs	Viruses	NA	NA	NA	NA	NA	Wenzhou picorna-like virus 19: 1.00
SRR3726699_551	X			no hits to database
SRR3726699_52358	X			based on 1/1 ORFs
SRR3726699_48208	X			based on 1/1 ORFs
SRR1950942_18488	X			based on 1/1 ORFs	Viruses	NA	NA	NA	NA	NA	Wenzhou picorna-like virus 19: 1.00
SRR3726699_47230	X			no hits to database
SRR1950942_1510	X			based on 1/1 ORFs	Viruses	NA	NA	NA	NA	NA	Wenzhou picorna-like virus 19: 1.00
SRR3726699_40616	X			no hits to database
SRR1950941_45468	X			based on 1/2 ORFs	Viruses	NA	NA	NA	NA	NA	Burkholderiales phage 68_11: 1.00
SRR1950941_42126	X			based on 1/1 ORFs	Viruses	NA	NA	NA	NA	NA	Burkholderiales phage 68_11: 1.00
SRR3726699_2265	X			based on 2/3 ORFs
SRR3726699_17276	X			no hits to database
SRR1950941_33791	X			based on 1/1 ORFs	Viruses	NA	NA	NA	NA	NA	Phage 65_10: 1.00
SRR1950940_56462	X			based on 1/1 ORFs	Viruses	NA	NA	NA	NA	NA	Laitoushanzui virus: 1.00
SRR1950940_50971	X			based on 1/1 ORFs	Viruses	NA	NA	NA	NA	NA	Laitoushanzui virus: 1.00
SRR1950940_47019	X			based on 1/1 ORFs	Viruses	NA	NA	NA	NA	NA	Rudphi virus 1: 1.00
SRR3726699_104065	X			based on 1/1 ORFs
SRR1950939_63804	X			based on 1/1 ORFs	Viruses	NA	NA	NA	NA	NA	Burkholderiales phage 68_11: 1.00
SRR1719366_85240	X			based on 1/1 ORFs	Viruses	NA	NA	NA	NA	NA	Burkholderiales phage 68_11: 1.00
SRR3726697_42783	X			based on 1/1 ORFs
SRR3726694_44343	X			based on 2/2 ORFs	Viruses	Negarnaviricota	Monjiviricetes: 0.58	Mononegavirales: 0.58	Nyamiviridae: 0.58	Berhavirus: 0.58	Sipunculid berhavirus: 0.58
SRR3726697_25109	X			based on 1/1 ORFs
SRR3726697_15429	X			based on 1/2 ORFs
SRR3726694_11097	X			based on 2/3 ORFs	Viruses	Negarnaviricota	Monjiviricetes: 0.61	Mononegavirales: 0.61	Rhabdoviridae: 0.61	Arurhavirus: 0.61	Santabarbara arurhavirus: 0.61
SRR3726699_2567	X		X	based on 1/4 ORFs	Viruses	Negarnaviricota	Monjiviricetes: 1.00	Mononegavirales: 1.00	Nyamiviridae: 1.00	Berhavirus: 1.00	Sipunculid berhavirus: 1.00
SRR3726694_24261	X	X	X	based on 3/4 ORFs	Viruses	Negarnaviricota	Monjiviricetes: 1.00	Mononegavirales: 1.00	Nyamiviridae: 0.54	Berhavirus: 0.54
SRR1950951_35903	X		X	based on 1/1 ORFs	Viruses	Negarnaviricota	Monjiviricetes: 1.00	Mononegavirales: 1.00	Rhabdoviridae: 1.00	Novirhabdovirus: 1.00
SRR3726696_42592	X			no hits to database
SRR6894132_4163	X			based on 1/2 ORFs	Viruses	Negarnaviricota	Monjiviricetes: 1.00	Mononegavirales: 1.00	Nyamiviridae: 1.00
SRR3726696_36388	X			based on 1/1 ORFs
SRR4190242_99916	X			based on 1/1 ORFs	Viruses	Negarnaviricota	Monjiviricetes: 1.00	Mononegavirales: 1.00	Nyamiviridae: 1.00	Berhavirus: 1.00
SRR3726696_34108	X			no hits to database
SRR4190242_96121	X			based on 1/1 ORFs	Viruses	Negarnaviricota	Monjiviricetes: 1.00	Mononegavirales: 1.00	Rhabdoviridae: 1.00
SRR4190242_9137	X	X		based on 3/3 ORFs	Viruses	Negarnaviricota	Monjiviricetes: 1.00	Mononegavirales: 1.00	Nyamiviridae: 0.53	Berhavirus: 0.53	Sipunculid berhavirus: 0.53
SRR3726706_54272	X			based on 1/1 ORFs	Viruses	Negarnaviricota	Monjiviricetes: 1.00	Mononegavirales: 1.00	Nyamiviridae: 1.00	Berhavirus: 1.00	Sipunculid berhavirus: 1.00
SRR3726706_40608	X			based on 1/1 ORFs	Viruses	Negarnaviricota	Monjiviricetes: 1.00	Mononegavirales: 1.00
SRR3726703_93192	X			based on 1/1 ORFs	Viruses	Negarnaviricota	Monjiviricetes: 1.00	Mononegavirales: 1.00
SRR3726703_73792	X			based on 1/1 ORFs	Viruses	Negarnaviricota	Monjiviricetes: 1.00	Mononegavirales: 1.00
SRR3726703_48916	X			based on 1/1 ORFs	Viruses	Negarnaviricota	Monjiviricetes: 1.00	Mononegavirales: 1.00	Nyamiviridae: 1.00
SRR3726694_67039	X			no hits to database
SRR3726694_62664	X			no hits to database
SRR3726703_13042	X			based on 1/1 ORFs	Viruses	Negarnaviricota	Monjiviricetes: 1.00	Mononegavirales: 1.00	Nyamiviridae: 1.00	Berhavirus: 1.00	Sipunculid berhavirus: 1.00
SRR3726703_111580	X			based on 1/1 ORFs	Viruses	Negarnaviricota	Monjiviricetes: 1.00	Mononegavirales: 1.00	Nyamiviridae: 1.00	Berhavirus: 1.00	Sipunculid berhavirus: 1.00
SRR3726701_17147	X			based on 1/1 ORFs	Viruses	Negarnaviricota	Monjiviricetes: 1.00	Mononegavirales: 1.00	Rhabdoviridae: 1.00
SRR3726699_93020	X			based on 1/1 ORFs	Viruses	Negarnaviricota	Monjiviricetes: 1.00	Mononegavirales: 1.00	Nyamiviridae: 1.00
SRR3726694_38437	X			based on 1/1 ORFs
SRR3726699_92866	X			based on 1/1 ORFs	Viruses	Negarnaviricota	Monjiviricetes: 1.00	Mononegavirales: 1.00	Rhabdoviridae: 1.00
SRR3726699_82859	X			based on 1/1 ORFs	Viruses	Negarnaviricota	Monjiviricetes: 1.00	Mononegavirales: 1.00	Nyamiviridae: 1.00
SRR3726699_73831	X			based on 1/1 ORFs	Viruses	Negarnaviricota	Monjiviricetes: 1.00	Mononegavirales: 1.00	Rhabdoviridae: 1.00	Arurhavirus: 1.00	Santabarbara arurhavirus: 1.00
SRR3726699_73246	X			based on 1/2 ORFs	Viruses	Negarnaviricota	Monjiviricetes: 1.00	Mononegavirales: 1.00	Nyamiviridae: 1.00	Nyavirus: 1.00	Nyamanini nyavirus: 1.00
SRR3726699_69770	X			based on 2/2 ORFs	Viruses	Negarnaviricota	Monjiviricetes: 1.00	Mononegavirales: 1.00	Nyamiviridae: 1.00
SRR3726699_55673	X			based on 1/1 ORFs	Viruses	Negarnaviricota	Monjiviricetes: 1.00	Mononegavirales: 1.00	Rhabdoviridae: 1.00
SRR3726699_47707	X			based on 1/1 ORFs	Viruses	Negarnaviricota	Monjiviricetes: 1.00	Mononegavirales: 1.00
SRR3726699_12283	X			based on 1/1 ORFs	Viruses	Negarnaviricota	Insthoviricetes: 1.00	Articulavirales: 1.00	Orthomyxoviridae: 1.00	NA	Yancheng orthomyxo-like virus: 1.00
SRR3726693_67387	X			no hits to database
SRR3726699_103590	X			based on 1/1 ORFs	Viruses	Negarnaviricota	Monjiviricetes: 1.00	Mononegavirales: 1.00	Nyamiviridae: 1.00	Berhavirus: 1.00
SRR3726698_47344	X			based on 1/1 ORFs	Viruses	Negarnaviricota	Monjiviricetes: 1.00	Mononegavirales: 1.00	Nyamiviridae: 1.00	Berhavirus: 1.00	Echinoderm berhavirus: 1.00
SRR3726694_54748	X			based on 1/2 ORFs	Viruses	Negarnaviricota	Monjiviricetes: 1.00	Mononegavirales: 1.00	Nyamiviridae: 1.00
SRR3726694_47593	X			based on 1/1 ORFs	Viruses	Negarnaviricota	Monjiviricetes: 1.00	Mononegavirales: 1.00	Nyamiviridae: 1.00	Berhavirus: 1.00	Sipunculid berhavirus: 1.00
SRR3726694_34149	X			based on 3/3 ORFs	Viruses	Negarnaviricota	Monjiviricetes: 1.00	Mononegavirales: 1.00	Nyamiviridae: 0.59
SRR3726694_33144	X			based on 1/1 ORFs	Viruses	Negarnaviricota	Monjiviricetes: 1.00	Mononegavirales: 1.00	Rhabdoviridae: 1.00
SRR3726693_62395	X			based on 1/1 ORFs
SRR3726693_68424	X	X		based on 1/1 ORFs	Viruses	Negarnaviricota	Monjiviricetes: 1.00	Mononegavirales: 1.00
SRR3726693_64099	X			based on 1/1 ORFs	Viruses	Negarnaviricota	Monjiviricetes: 1.00	Mononegavirales: 1.00
SRR3726693_63065	X			based on 1/1 ORFs	Viruses	Negarnaviricota	Monjiviricetes: 1.00	Mononegavirales: 1.00	Nyamiviridae: 1.00	Berhavirus: 1.00	Sipunculid berhavirus: 1.00
SRR3726693_53893	X			based on 1/1 ORFs	Viruses	Negarnaviricota	Monjiviricetes: 1.00	Mononegavirales: 1.00
SRR3726693_53148	X			based on 1/1 ORFs	Viruses	Negarnaviricota	Monjiviricetes: 1.00	Mononegavirales: 1.00	Nyamiviridae: 1.00
SRR3726693_51772	X			based on 1/1 ORFs	Viruses	Negarnaviricota	Monjiviricetes: 1.00	Mononegavirales: 1.00	Rhabdoviridae: 1.00
SRR3726693_27549	X			based on 1/1 ORFs	Viruses	Negarnaviricota	Monjiviricetes: 1.00	Mononegavirales: 1.00	Nyamiviridae: 1.00
SRR3726693_24315	X			based on 1/1 ORFs	Viruses	Negarnaviricota	Monjiviricetes: 1.00	Mononegavirales: 1.00
SRR1950953_69069	X			based on 1/1 ORFs	Viruses	Negarnaviricota	Monjiviricetes: 1.00	Mononegavirales: 1.00
SRR3726693_49678	X			no hits to database
SRR1950953_28152	X			based on 2/2 ORFs	Viruses	Negarnaviricota	Monjiviricetes: 1.00	Mononegavirales: 1.00	Nyamiviridae: 1.00	Berhavirus: 1.00	Sipunculid berhavirus: 1.00
SRR3726693_46778	X			based on 1/1 ORFs
SRR1950952_66001	X			based on 1/1 ORFs	Viruses	Negarnaviricota	Monjiviricetes: 1.00	Mononegavirales: 1.00	Nyamiviridae: 1.00
SRR1950952_65956	X			based on 1/1 ORFs	Viruses	Negarnaviricota	Monjiviricetes: 1.00	Mononegavirales: 1.00	Nyamiviridae: 1.00
SRR1950952_61808	X			based on 1/1 ORFs	Viruses	Negarnaviricota	Monjiviricetes: 1.00	Mononegavirales: 1.00
SRR1950952_58032	X			based on 1/1 ORFs	Viruses	Negarnaviricota	Monjiviricetes: 1.00	Mononegavirales: 1.00	Nyamiviridae: 1.00	Berhavirus: 1.00	Sipunculid berhavirus: 1.00
SRR1950952_48326	X			based on 1/1 ORFs	Viruses	Negarnaviricota	Monjiviricetes: 1.00	Mononegavirales: 1.00
SRR1950952_41930	X			based on 1/1 ORFs	Viruses	Negarnaviricota	Monjiviricetes: 1.00	Mononegavirales: 1.00	Nyamiviridae: 1.00	Berhavirus: 1.00	Sipunculid berhavirus: 1.00
SRR1950952_41777	X			based on 1/2 ORFs	Viruses	Negarnaviricota	Monjiviricetes: 1.00	Mononegavirales: 1.00	Nyamiviridae: 1.00	Berhavirus: 1.00	Beihai berhavirus: 1.00
SRR1950952_14637	X			based on 1/1 ORFs	Viruses	Negarnaviricota	Monjiviricetes: 1.00	Mononegavirales: 1.00	Nyamiviridae: 1.00	NA	San Jacinto virus: 1.00
SRR1950951_80047	X			based on 1/1 ORFs	Viruses	Negarnaviricota	Monjiviricetes: 1.00	Mononegavirales: 1.00	Nyamiviridae: 1.00
SRR1950951_68090	X			based on 1/1 ORFs	Viruses	Negarnaviricota	Monjiviricetes: 1.00	Mononegavirales: 1.00
SRR1950944_55231	X			based on 1/1 ORFs	Viruses	Negarnaviricota	Monjiviricetes: 1.00	Mononegavirales: 1.00
SRR1950940_6276	X			based on 1/2 ORFs	Viruses	Negarnaviricota	Monjiviricetes: 1.00	Mononegavirales: 1.00	Rhabdoviridae: 1.00
SRR1950939_45575	X			based on 1/1 ORFs	Viruses	Negarnaviricota	Monjiviricetes: 1.00	Mononegavirales: 1.00	Nyamiviridae: 1.00
SRR1719366_32447	X			based on 1/1 ORFs	Viruses	Negarnaviricota	Monjiviricetes: 1.00	Mononegavirales: 1.00	Nyamiviridae: 1.00
SRR6875319_10006	X			based on 2/2 ORFs	Viruses	Nucleocytoviricota	Megaviricetes: 0.61	Imitervirales: 0.61	Mimiviridae: 0.61	NA	Faunusvirus sp.: 0.61
SRR6875317_24946	X			based on 1/1 ORFs	Viruses	Nucleocytoviricota	Megaviricetes: 1.00	Imitervirales: 1.00	Mimiviridae: 1.00	Klosneuvirus: 1.00	Klosneuvirus KNV1: 1.00
SRR5527414_24062	X			based on 1/1 ORFs	Viruses	Nucleocytoviricota	Pokkesviricetes: 1.00	Chitovirales: 1.00	Poxviridae: 1.00
SRR4190242_83725	X			based on 1/1 ORFs	Viruses	Nucleocytoviricota	Megaviricetes: 1.00	Imitervirales: 1.00	Mimiviridae: 1.00
SRR4190242_62919	X			based on 1/1 ORFs	Viruses	Nucleocytoviricota	Megaviricetes: 1.00	Algavirales: 1.00	Phycodnaviridae: 1.00	NA	Tetraselmis virus 1: 1.00
SRR4190242_36263	X			based on 1/1 ORFs	Viruses	Nucleocytoviricota	Megaviricetes: 1.00	Imitervirales: 1.00	Mimiviridae: 1.00	NA	Moumouvirus: 1.00
SRR3726693_18282	X			based on 1/1 ORFs
SRR4190242_12192	X			based on 1/1 ORFs	Viruses	Nucleocytoviricota	Megaviricetes: 1.00	Imitervirales: 1.00	Mimiviridae: 1.00	NA	Moumouvirus: 1.00
SRR3726705_8763	X			based on 1/2 ORFs	Viruses	Nucleocytoviricota	Pokkesviricetes: 1.00	Chitovirales: 1.00	Poxviridae*: 1.00
SRR3726705_7093	X			based on 2/2 ORFs	Viruses	Nucleocytoviricota	Pokkesviricetes: 1.00	Chitovirales: 1.00	Poxviridae: 1.00
SRR3726705_6829	X			based on 2/3 ORFs	Viruses	Nucleocytoviricota	Pokkesviricetes: 1.00	Chitovirales: 1.00	Poxviridae: 1.00	Alphaentomopoxvirus: 0.54	Anomala cuprea entomopoxvirus*: 0.54
SRR3726705_37053	X			based on 1/1 ORFs	Viruses	Nucleocytoviricota	Pokkesviricetes: 1.00	Chitovirales: 1.00	Poxviridae: 1.00
SRR3726705_36667	X			based on 1/1 ORFs	Viruses	Nucleocytoviricota	Pokkesviricetes: 1.00	Chitovirales: 1.00	Poxviridae: 1.00	Avipoxvirus: 1.00
SRR3726705_18836	X			based on 1/1 ORFs	Viruses	Nucleocytoviricota	Pokkesviricetes: 1.00	Chitovirales: 1.00	Poxviridae: 1.00
SRR3726704_45047	X			based on 1/1 ORFs	Viruses	Nucleocytoviricota	Megaviricetes: 1.00	Imitervirales: 1.00	Mimiviridae: 1.00	NA	Mimiviridae sp. ChoanoV1: 1.00
SRR3726704_38105	X			based on 1/1 ORFs	Viruses	Nucleocytoviricota	Megaviricetes: 1.00	Imitervirales: 1.00	Mimiviridae: 1.00
SRR3726703_82381	X			based on 1/1 ORFs	Viruses	Nucleocytoviricota	Megaviricetes: 1.00	Imitervirales: 1.00	Mimiviridae: 1.00
SRR3726703_54618	X			based on 1/1 ORFs	Viruses	Nucleocytoviricota	Megaviricetes: 1.00	Imitervirales: 1.00	Mimiviridae: 1.00	NA	Mimiviridae sp. ChoanoV1: 1.00
SRR3726703_2804	X			based on 1/1 ORFs	Viruses	Nucleocytoviricota	Megaviricetes: 1.00	Imitervirales: 1.00	Mimiviridae: 1.00	Klosneuvirus: 1.00	Klosneuvirus KNV1: 1.00
SRR3726703_118938	X			based on 1/1 ORFs	Viruses	Nucleocytoviricota	Megaviricetes: 1.00	Imitervirales: 1.00	Mimiviridae: 1.00	NA	Terrestrivirus sp.: 1.00
SRR2004329_26005	X			based on 1/1 ORFs	Viruses	Nucleocytoviricota	Megaviricetes: 1.00	Pimascovirales: 1.00	Marseilleviridae: 1.00	NA	Marseillevirus LCMAC102: 1.00
SRR1950954_35701	X			based on 1/1 ORFs
SRR1950954_32928	X			no hits to database
SRR1950954_1376	X			based on 1/2 ORFs	Viruses	Nucleocytoviricota	Megaviricetes: 1.00	Imitervirales: 1.00	Mimiviridae: 1.00	NA	Moumouvirus: 1.00
SRR1950951_46791	X			based on 1/1 ORFs	Viruses	Nucleocytoviricota	Megaviricetes: 1.00	Imitervirales: 1.00	Mimiviridae: 1.00	NA	Terrestrivirus sp.: 1.00
SRR1950951_21079	X			based on 1/1 ORFs	Viruses	Nucleocytoviricota	Megaviricetes: 1.00	Algavirales: 1.00	Phycodnaviridae: 1.00	NA	Tetraselmis virus 1: 1.00
SRR1950941_18570	X			based on 1/1 ORFs	Viruses	Nucleocytoviricota	Megaviricetes: 1.00	Imitervirales: 1.00	Mimiviridae: 1.00	NA	Moumouvirus: 1.00
SRR5527414_4971	X			based on 1/2 ORFs	Viruses	Peploviricota	Herviviricetes*: 1.00	Herpesvirales*: 1.00
SRR5527414_45706	X			based on 1/1 ORFs	Viruses	Peploviricota	Herviviricetes*: 1.00	Herpesvirales*: 1.00
SRR5527414_45671	X			based on 1/1 ORFs	Viruses	Peploviricota	Herviviricetes*: 1.00	Herpesvirales*: 1.00
SRR5527414_41563	X			based on 1/1 ORFs	Viruses	Peploviricota	Herviviricetes*: 1.00	Herpesvirales*: 1.00
SRR5527414_38597	X			based on 1/1 ORFs	Viruses	Peploviricota	Herviviricetes*: 1.00	Herpesvirales*: 1.00
SRR5527414_32006	X			based on 1/1 ORFs	Viruses	Peploviricota	Herviviricetes*: 1.00	Herpesvirales*: 1.00
SRR5527414_30676	X			based on 1/1 ORFs	Viruses	Peploviricota	Herviviricetes*: 1.00	Herpesvirales*: 1.00
SRR5527414_29164	X			based on 1/2 ORFs	Viruses	Peploviricota	Herviviricetes*: 1.00	Herpesvirales*: 1.00
SRR5527414_26768	X			based on 1/1 ORFs	Viruses	Peploviricota	Herviviricetes*: 1.00	Herpesvirales*: 1.00
SRR5527414_22198	X			based on 1/1 ORFs	Viruses	Peploviricota	Herviviricetes*: 1.00	Herpesvirales*: 1.00
SRR5527414_21234	X			based on 1/1 ORFs	Viruses	Peploviricota	Herviviricetes*: 1.00	Herpesvirales*: 1.00
SRR5527414_20979	X			based on 1/1 ORFs	Viruses	Peploviricota	Herviviricetes*: 1.00	Herpesvirales*: 1.00
SRR5527414_19889	X			based on 1/1 ORFs	Viruses	Peploviricota	Herviviricetes*: 1.00	Herpesvirales*: 1.00
SRR1950953_33202	X			no hits to database
SRR1950953_32778	X			no hits to database
SRR5527414_14968	X			based on 1/1 ORFs	Viruses	Peploviricota	Herviviricetes: 1.00	Herpesvirales: 1.00	Malacoherpesviridae: 1.00
SRR1950953_26827	X			no hits to database
SRR5527414_13299	X			based on 1/1 ORFs	Viruses	Peploviricota	Herviviricetes*: 1.00	Herpesvirales*: 1.00
SRR3726696_22111	X	X	X	based on 1/2 ORFs	Viruses	Pisuviricota	Pisoniviricetes: 1.00	Picornavirales: 1.00	NA	NA	Biomphalaria virus 4: 1.00
SRR1950953_17699	X			no hits to database
SRR1950953_15601	X		X	based on 1/1 ORFs	Viruses	Pisuviricota	Pisoniviricetes: 1.00	Picornavirales: 1.00	NA	NA	Picornavirales sp.: 1.00
SRR1950953_13632	X			no hits to database
SRR5527414_11971	X			based on 1/1 ORFs	Viruses	Pisuviricota	Pisoniviricetes: 1.00	Picornavirales: 1.00	Dicistroviridae: 1.00	NA	Macrobrachium rosenbergii dicistrovirus 2: 1.00
SRR3726706_729	X			based on 1/1 ORFs	Viruses	Pisuviricota	Pisoniviricetes: 1.00	Picornavirales: 1.00	Picornaviridae: 1.00
SRR1950952_70626	X			based on 1/1 ORFs
SRR1950952_69255	X			no hits to database
SRR3726706_637	X			based on 1/1 ORFs	Viruses	Pisuviricota	Pisoniviricetes: 1.00	Picornavirales: 1.00	Picornaviridae: 1.00	NA	Feline picornavirus: 1.00
SRR3726705_3315	X			based on 1/1 ORFs	Viruses	Pisuviricota	Pisoniviricetes: 1.00	Picornavirales: 1.00
SRR3726696_35003	X			based on 1/1 ORFs	Viruses	Pisuviricota	Pisoniviricetes: 1.00	Picornavirales: 1.00	NA	NA	Biomphalaria virus 4: 1.00
SRR3726693_49188	X			based on 1/1 ORFs	Viruses	Pisuviricota	Pisoniviricetes: 1.00	Picornavirales: 1.00	Dicistroviridae: 1.00	NA	Bivalve RNA virus G5: 1.00
SRR1950952_59960	X			based on 1/1 ORFs	Eukaryota	Mollusca	Gastropoda: 1.00	Architaenioglossa: 1.00	Ampullariidae: 1.00	Pomacea: 1.00	Pomacea canaliculata: 1.00
SRR3726693_43680	X			based on 1/1 ORFs	Viruses	Pisuviricota	Pisoniviricetes: 1.00	Picornavirales: 1.00
SRR3726693_22552	X			based on 1/1 ORFs	Viruses	Pisuviricota	Pisoniviricetes: 1.00	Nidovirales: 1.00	NA	NA	Aplysia californica nido-like virus: 1.00
SRR1950953_62637	X			based on 1/1 ORFs	Viruses	Pisuviricota	Pisoniviricetes: 1.00	Picornavirales: 1.00	NA	NA	Picornavirales Q_sR_OV_025: 1.00
SRR1950953_13364	X			based on 1/3 ORFs	Viruses	Pisuviricota	Pisoniviricetes: 1.00	Picornavirales: 1.00	Picornaviridae: 1.00
SRR1950952_36992	X			based on 1/1 ORFs
SRR1950950_75750	X			based on 1/1 ORFs	Viruses	Pisuviricota	Pisoniviricetes: 1.00	Nidovirales: 1.00	NA	NA	Aplysia californica nido-like virus: 1.00
SRR1950949_48678	X			based on 1/1 ORFs	Viruses	Pisuviricota	Pisoniviricetes: 1.00	Picornavirales: 1.00	Dicistroviridae: 1.00
SRR1950949_31593	X			based on 1/1 ORFs	Viruses	Pisuviricota	Pisoniviricetes: 1.00	Picornavirales: 1.00	Dicistroviridae: 1.00
SRR6894132_28171	X			based on 1/1 ORFs	Viruses	Uroviricota	Caudoviricetes: 1.00	Caudovirales: 1.00	Myoviridae: 1.00
SRR6894132_14907	X			based on 1/2 ORFs	Viruses	Uroviricota	Caudoviricetes: 1.00	Caudovirales: 1.00	Siphoviridae: 1.00	Cheoctovirus: 1.00	Mycobacterium virus Avani: 1.00
SRR4190242_6357	X		X	based on 1/1 ORFs	Viruses
SRR1950951_56306	X			based on 1/1 ORFs
SRR3726705_1238	X	X	X	based on 2/2 ORFs	Viruses
SRR1950951_5889	X	X	X	based on 1/1 ORFs	Viruses
SRR1950951_1091	X		X	based on 1/1 ORFs	Viruses
SRR1950949_2406	X	X	X	based on 1/3 ORFs	Viruses
SRR1950948_28126	X	X	X	based on 1/1 ORFs	Viruses
SRR1950951_13051	X			no hits to database
SRR1950940_9119	X		X	based on 1/1 ORFs	Viruses
SRR6894129_3769	X			based on 1/2 ORFs	Viruses
SRR1950950_7379	X			no hits to database
SRR5527414_28209	X	X		based on 1/2 ORFs	Viruses
SRR4190242_76115	X			based on 1/1 ORFs	Viruses
SRR3738852_65576	X	X		based on 1/1 ORFs	Viruses
SRR1950950_39187	X			no ORFs found
SRR1950950_34071	X			no hits to database
SRR3738852_10408	X			based on 2/2 ORFs	Viruses
SRR3726707_19855	X			based on 1/1 ORFs	Viruses
SRR3726706_822	X			based on 1/1 ORFs	Viruses
SRR3726706_48036	X			based on 1/1 ORFs	Viruses
SRR3726706_35643	X	X		based on 1/1 ORFs	Viruses
SRR3726705_67419	X			based on 1/1 ORFs	Viruses
SRR3726705_66031	X			based on 1/1 ORFs	Viruses
SRR1950949_23255	X			no ORFs found
SRR3726705_62421	X			based on 1/1 ORFs	Viruses
SRR3726705_58480	X			based on 1/1 ORFs	Viruses
SRR3726705_51112	X	X		based on 1/1 ORFs	Viruses
SRR3726705_35617	X			based on 1/1 ORFs	Viruses
SRR3726705_33331	X			based on 1/1 ORFs	Viruses
SRR3726705_27399	X			based on 1/1 ORFs	Viruses
SRR3726705_22968	X			based on 1/1 ORFs	Viruses
SRR3726704_73918	X			based on 1/1 ORFs	Viruses
SRR3726704_55650	X			based on 1/1 ORFs	Viruses
SRR3726700_45695	X			based on 1/1 ORFs	Viruses
SRR3726700_41406	X			based on 1/1 ORFs	Viruses
SRR3726700_40234	X			based on 1/1 ORFs	Viruses
SRR3726700_22248	X			based on 1/2 ORFs	Viruses
SRR3726699_94792	X			based on 1/1 ORFs	Viruses
SRR3726699_85047	X			based on 1/1 ORFs	Viruses
SRR3726699_79957	X			based on 1/1 ORFs	Viruses
SRR3726697_32831	X			based on 1/1 ORFs	Viruses
SRR3726697_14379	X			based on 1/1 ORFs	Viruses
SRR3726696_57083	X			based on 1/1 ORFs	Viruses
SRR3726696_51813	X			based on 1/1 ORFs	Viruses
SRR1950947_9386	X			based on 1/1 ORFs	Eukaryota
SRR3726696_32133	X			based on 1/1 ORFs	Viruses
SRR3726695_55484	X			based on 1/1 ORFs	Viruses
SRR3726695_44141	X			based on 1/1 ORFs	Viruses
SRR1950945_55797	X			no hits to database
SRR3726695_39599	X			based on 1/1 ORFs	Viruses
SRR1950945_3844	X			based on 5/5 ORFs
SRR3726695_30951	X			based on 1/1 ORFs	Viruses
SRR3726693_7195	X			based on 1/1 ORFs	Viruses
SRR3726693_68269	X			based on 1/1 ORFs	Viruses
SRR1950944_49780	X			based on 1/1 ORFs
SRR1950944_48791	X			based on 1/1 ORFs
SRR3726693_57019	X			based on 1/1 ORFs	Viruses
SRR3726693_49709	X			based on 1/1 ORFs	Viruses
SRR3726693_40427	X			based on 1/1 ORFs	Viruses
SRR1950944_15610	X			based on 1/1 ORFs
SRR3726693_3872	X			based on 1/2 ORFs	Viruses
SRR1950943_6397	X			no hits to database
SRR3726693_13670	X			based on 2/4 ORFs	Viruses
SRR3726692_30722	X			based on 1/1 ORFs	Viruses
SRR2004329_1638	X	X		based on 1/1 ORFs	Viruses
SRR2004329_16135	X			based on 1/1 ORFs	Viruses
SRR1950954_27545	X			based on 1/1 ORFs	Viruses
SRR1950953_78068	X			based on 1/1 ORFs	Viruses
SRR1950953_72226	X			based on 1/1 ORFs	Viruses
SRR1950953_71050	X	X		based on 1/1 ORFs	Viruses
SRR1950953_70613	X			based on 1/1 ORFs	Viruses
SRR1950953_65206	X			based on 1/1 ORFs	Viruses
SRR1950941_5219	X			based on 2/5 ORFs
SRR1950953_61430	X			based on 1/1 ORFs	Viruses
SRR1950953_44422	X			based on 1/1 ORFs	Viruses
SRR1950953_37864	X			based on 1/1 ORFs	Viruses
SRR1950941_26790	X			no hits to database
SRR1950953_13675	X			based on 1/1 ORFs	Viruses
SRR1950952_66751	X			based on 1/1 ORFs	Viruses
SRR1950951_89124	X			based on 1/1 ORFs	Viruses
SRR1950951_73454	X			based on 1/1 ORFs	Viruses
SRR1950940_74475	X			no hits to database
SRR1950950_48458	X			based on 1/2 ORFs	Viruses
SRR1950949_51994	X			based on 1/1 ORFs	Viruses
SRR1950948_91407	X			based on 1/1 ORFs	Viruses
SRR1950948_74715	X			based on 1/1 ORFs	Viruses
SRR1950948_68779	X			based on 1/1 ORFs	Viruses
SRR1950948_61858	X			based on 1/1 ORFs	Viruses
SRR1950940_51310	X			no hits to database
SRR1950948_44572	X			based on 1/1 ORFs	Viruses
SRR1950948_24093	X			based on 1/1 ORFs	Viruses
SRR1950948_20546	X			based on 1/1 ORFs	Viruses
SRR1950945_39955	X			based on 1/1 ORFs	Viruses
SRR1950944_59050	X			based on 1/1 ORFs	Viruses
SRR1950944_27518	X			based on 1/1 ORFs	Viruses
SRR1950943_65091	X			based on 1/1 ORFs	Viruses
SRR1950943_52428	X			based on 1/1 ORFs	Viruses
SRR1950943_48319	X			based on 1/1 ORFs	Viruses
SRR1950940_74600	X			based on 1/2 ORFs	Viruses
SRR1950940_56630	X			based on 1/1 ORFs	Viruses
SRR1950940_51850	X	X		based on 1/1 ORFs	Viruses
SRR1721590_9850	X			no hits to database
SRR1721590_12850	X			based on 3/4 ORFs
SRR1950940_49603	X			based on 1/1 ORFs	Viruses
SRR1719366_78649	X			based on 1/1 ORFs
SRR1950940_34753	X			based on 1/1 ORFs	Viruses
SRR1719366_76165	X			no hits to database
SRR1950940_12651	X			based on 1/1 ORFs	Viruses
SRR1950939_59919	X			based on 1/1 ORFs	Viruses
SRR1950939_47921	X			based on 1/1 ORFs	Viruses
SRR1719366_45978	X			no ORFs found
SRR1950939_45645	X			based on 1/1 ORFs	Viruses
SRR1950939_32909	X			based on 1/1 ORFs	Viruses
SRR1719366_78097	X			based on 1/1 ORFs	Viruses
SRR4190242_9368		X		based on 1/2 ORFs	Eukaryota	Arthropoda	Insecta: 1.00	Diptera: 1.00	Calliphoridae: 1.00	Lucilia: 1.00	Lucilia cuprina: 1.00
SRR3726706_8850		X		based on 1/1 ORFs	Eukaryota	Mollusca	Gastropoda: 1.00
SRR3726705_43684		X		based on 1/1 ORFs	Eukaryota	Mollusca
